# Supplementary material for: Fe(iii)-Catalyzed synthesis of pyrrolo[3,2-b]pyrroles: formation of new dyes and photophysical studies
Source: Royal Society of Chemistry journal article supplement (doi:10.1039/c9qo00675c), 2019-01-01

Supporting information for

## **Fe(III)-catalyzed synthesis of pyrrolo[3,2-*b*]pyrroles: formation of new dyes and photophysical studies**

Mariusz Tasiar, Beata Koszarna, David C. Young, Beata Bernard, Denis Jacquemin, Dorota Gryko and Daniel T. Gryko

### **Table of contents**

|                                                        |              |
|--------------------------------------------------------|--------------|
| <b>1. Experimental part</b>                            | <b>2-5</b>   |
| <b>2. <sup>1</sup>H and <sup>13</sup>C NMR spectra</b> | <b>6-22</b>  |
| <b>3. Absorption and emission spectra</b>              | <b>23-25</b> |

## Experimental

### General information

All chemicals were used as received, unless otherwise noted. All reported NMR spectra were recorded on a 500 MHz spectrometer unless otherwise noted. Chemical shifts ( $\delta$ ; ppm) for  $^1\text{H}$  and  $^{13}\text{C}$  NMR were determined with TMS as the internal reference.  $J$  values are given in Hz. The absorption and fluorescence spectra were recorded in toluene or in  $\text{CH}_2\text{Cl}_2$ . Mass spectra were obtained with EI ion source and the EBE double focusing geometry mass analyzer or spectrometer equipped with electro-spray ion source with Q-TOF type mass analyzer. The analysis of compounds **3a**, **3b**, **3c**, **3g**, **3h**, **3i**, **3j**, **3k**, **3l**, **3m**, **3n** and **3t** have been described previously.

### General Procedure for the Synthesis of Pyrrolo[3,2-*b*]pyrrole

Glacial acetic acid (1,5 mL), toluene (1,5 mL), aldehyde (2 mmol) and aniline (2 mmol) were placed in a 50 mL round-bottom flask equipped with a magnetic stir bar. The mixture was stirred at  $90^\circ\text{C}$  for 30 min. After that time,  $\text{Fe}(\text{ClO}_4)_3$  (20 mg) was added and subsequently diacetyl (88  $\mu\text{L}$ , 1 mmol). The resulting mixture left stirring at  $90^\circ\text{C}$  for 3 h. The reaction mixture was then cooled to room temperature. The precipitate of the obtained dye was filtered and washed with  $\text{CH}_3\text{CN}$ . Recrystallization from AcOEt and drying under vacuum afforded pure product.

### 2,5-Bis(4-cyanophenyl)-1,4-bis(naphth-1-yl)-1,4-dihydropyrrolo[3,2-*b*]pyrrole (**3d**)

Yellow solid. Yield: 180 mg (32%).  $^1\text{H}$  NMR (500 MHz,  $\text{CDCl}_3$ )  $\delta$  8.06 (d,  $J = 8.2$  Hz, 1H), 8.03 (d,  $J = 7.9$  Hz, 1H), 8.00 (d,  $J = 8.1$  Hz, 1H), 7.97 - 7.92 (m, 2H), 7.87 (d,  $J = 8.4$  Hz, 1H), 7.64 - 7.55 (m, 3H), 7.51 (t,  $J = 7.83$  Hz, 2H), 7.46 (t,  $J = 7.74$  Hz, 1H), 7.39 (d,  $J = 7.3$ , 1H), 7.26 - 7.31 (m, 4H), 7.21 (d,  $J = 7.3$  Hz, 1H), 7.15 - 7.06 (m, 4H), 6.29 (s, 1H), 6.27 (s, 1H) ppm;  $^{13}\text{C}$  NMR (126 MHz,  $\text{CDCl}_3$ )  $\delta$  137.4, 137.4, 137.2, 137.2, 136.1, 135.9, 135.1, 135.0, 134.7, 134.6, 131.9 (2), 130.0, 129.9, 128.6, 128.5, 128.4, 128.3, 127.3, 127.2, 127.0, 126.9, 126.8, 125.8, 125.7, 125.6 (2), 123.5, 123.5, 119.0, 108.9, 108.9, 96.2, 95.7 ppm. HRMS (EI):  $m/z$  calculated for  $\text{C}_{40}\text{H}_{24}\text{N}_4$ : 560.2001 [ $\text{M}^+$ ]; found: 560.1998.

### 2,5-Bis(4-cyanophenyl)-1,4-bis[3,5-bis(trifluoromethyl)phenyl]-1,4-dihydropyrrolo[3,2-*b*]pyrrole (**3e**)

Yellow solid. Yield: 352 mg (48%).  $^1\text{H}$  NMR (500 MHz,  $\text{CDCl}_3$ )  $\delta$  7.83 (s, 2H), 7.66 (s, 4H), 7.60, 7.29 (d,  $J = 8.5$  Hz, AA'BB', 8H), 6.55 (s, 2H) ppm;  $^{13}\text{C}$  NMR (126 MHz,  $\text{CDCl}_3$ )  $\delta$  140.4, 136.0, 135.5, 133.3 (q,  $J = 34.0$  Hz), 132.6, 132.5, 128.4, 124.8 (m), 123.7, 121.5, 120.1 (m), 118.4, 110.9, 97.8 ppm. HRMS (EI):  $m/z$  calculated for  $\text{C}_{36}\text{H}_{16}\text{F}_{12}\text{N}_4$ : 732.1183 [ $\text{M}^+$ ], found: 732.1185.

### 2,5-Bis(4-cyanophenyl)-1,4-bis(4-pentafluorosulfanylphenyl)-1,4-dihydropyrrolo[3,2-*b*]pyrrole (**3f**)

Yellow solid. Yield: 311 mg (44%).  $^1\text{H}$  NMR (500 MHz,  $\text{CDCl}_3$ )  $\delta$  7.82 (d,  $J = 9.1$  Hz, 4H), 7.57 (d,  $J = 8.5$  Hz, 4H), 7.33–7.26 (m, 8H), 6.56 (s, 2H) ppm;  $^{13}\text{C}$  NMR (126 MHz,  $\text{CDCl}_3$ ):  $\delta$  151.4, 141.5, 136.7, 135.3, 132.9, 132.4, 128.2, 127.6, 124.6, 118.6, 110.4, 97.9 ppm. HRMS (ESI):  $m/z$  calculated for  $\text{C}_{32}\text{H}_{17}\text{N}_4\text{F}_{10}\text{S}_2$ : 711.0735 [ $\text{M}-\text{H}^+$ ]; found: 711.0717.

### 2,5-Bis(2-chlorobenzo[*h*]quinolin-3-yl)-1,4-bis(4-methylphenyl)-1,4-dihydropyrrolo[3,2-*b*]pyrrole (**3o**)

Beige solid. Yield: 484 mg (68%). <sup>1</sup>H NMR (500 MHz, THF-*d*<sub>8</sub>) δ 9.09 - 9.17 (m, 2H), 8.33 (s, 2H), 7.93 - 8.03 (m, 2H), 7.89 (d, *J* = 8.8 Hz, 2H), 7.62 - 7.79 (m, 6H), 7.13, 7.24 (dd, *J* = 8.1 Hz, AA'BB', 8H), 6.65 (s, 2H), 2.29 ppm (s, 6H); <sup>13</sup>C NMR (126 MHz, THF-*d*<sub>8</sub>) δ 150.2, 145.9, 141.0, 138.5, 136.1, 135.0, 132.0, 131.8, 131.3, 130.6, 129.5, 129.1 (2), 128.7, 128.0, 126.0, 125.5, 125.3, 124.9, 98.1, 20.9 ppm. HRMS (EI): *m/z* calculated for C<sub>46</sub>H<sub>30</sub>Cl<sub>2</sub>N<sub>4</sub>: 708.1848 [M<sup>+</sup>], found: 708.1850.

**2,5-Bis[4-(acridin-9-yl)phenyl]-1,4-bis(4-methylphenyl)-1,4-dihydropyrrolo[3,2-*b*]pyrrole (3p)**

Yellow solid. Yield: 254 mg (32%). <sup>1</sup>H NMR (500 MHz, CDCl<sub>3</sub>) δ 8.28 (d, *J* = 9.2 Hz, 4H), 7.78 (d, *J* = 8.5 Hz, 8H), 7.50 (d, *J* = 7.9 Hz, 4H), 7.46 (t, *J* = 7.7 Hz, 4H), 7.37 (d, *J* = 8.2 Hz, 4H), 7.33 (d, *J* = 7.8 Hz, 4H), 7.28 (d, *J* = 8.1 Hz, 4H), 6.61 (s, 2H), 2.43 (s, 6H) ppm; <sup>13</sup>C NMR (126 MHz, CDCl<sub>3</sub>) δ 148.9, 147.1, 137.5, 135.8, 135.5, 133.9, 133.4, 132.3, 130.5, 130.0, 129.9, 129.7, 127.9, 126.9, 125.6, 125.2, 125.1, 95.0, 77.3, 77.0, 76.8, 21.1 ppm. HRMS (ESI): *m/z* calculated for C<sub>58</sub>H<sub>41</sub>N<sub>4</sub>: 793.3331 [M+H<sup>+</sup>], found: 793.3345.

**1,4-Bis(4-methylphenyl)-2,5-bis(thien-2-yl)-1,4-dihydropyrrolo[3,2-*b*]pyrrole (3q)**

Beige solid. Yield: 54 mg (12%). <sup>1</sup>H NMR (500 MHz, CDCl<sub>3</sub>) δ 7.21, 7.27 (AA'BB', *J* = 8.2 Hz, 8H), 7.09 (d, *J* = 4.9 Hz, 2H), 6.85 (dd, *J*<sub>2</sub> = 5.1 Hz, *J*<sub>1</sub> = 3.7 Hz, 2H), 6.62 (d, *J* = 3.1 Hz, 2H), 6.32 (s, 2H), 2.41 (s, 6H) ppm; <sup>13</sup>C NMR (125 MHz, CDCl<sub>3</sub>) δ 136.9, 136.4, 135.9, 131.7, 129.7, 129.6, 127.1, 126.1, 124.7, 123.8, 93.9, 21.1 ppm. HRMS (EI): *m/z* calculated for C<sub>28</sub>H<sub>22</sub>N<sub>2</sub>S<sub>2</sub>: 450.1224 [M<sup>+</sup>], found: 450.1222.

**1,4-Bis(4-methylphenyl)-2,5-bis(5-nitrofur-2-yl)-1,4-dihydropyrrolo[3,2-*b*]pyrrole (3r)**

Purple solid. Yield: 173 mg (13%). <sup>1</sup>H NMR (500 MHz, THF-*d*<sub>8</sub>) δ 7.40 (s, 8H), 7.28 (d, *J* = 4.0 Hz, 2H), 6.70 (s, 2H), 5.81 (d, *J* = 4.0 Hz, 2H), 2.47 (s, 6H) ppm; <sup>13</sup>C NMR (126 MHz, CDCl<sub>3</sub>) δ 150.6, 138.9, 135.6, 135.0, 130.5, 127.9, 126.6, 114.4, 107.9, 95.0, 21.3 ppm. HRMS (EI): *m/z* calculated for C<sub>28</sub>H<sub>20</sub>N<sub>2</sub>O<sub>6</sub>: 508.1383 [M<sup>+</sup>], found: 508.1361.

**2,5-Bis(benzothiazol-2-yl)-1,4-bis(3,5-di-*tert*-butylphenyl)-1,4-dihydropyrrolo[3,2-*b*]pyrrole (3s)**

Yellow solid. Yield: 113 mg (15%). <sup>1</sup>H NMR (500 MHz, CDCl<sub>3</sub>) δ 7.87 (d, *J* = 8.1 Hz, 2H), 7.70 (d, *J* = 7.8 Hz, 2H), 7.53 (t, *J* = 1.8 Hz, 2H), 7.41 - 7.36 (m, 2H), 7.36 (d, *J* = 1.8 Hz, 4H), 7.20 - 7.27 (m, 2H), 6.99 (s, 2H), 1.35 (s, 36H) ppm; <sup>13</sup>C NMR (126 MHz, CDCl<sub>3</sub>) δ 159.4, 153.1, 152.1, 137.5, 135.0, 134.7, 132.9, 126.0, 124.3, 122.4, 122.0, 121.9, 120.9, 96.5, 35.1, 31.4 ppm. HRMS (ESI): *m/z* calculated for C<sub>48</sub>H<sub>53</sub>N<sub>4</sub>S<sub>2</sub>: 749.3712 [M+H<sup>+</sup>], found: 749.3694.

**1,4-Bis(3,5-di-*tert*-butylphenyl)-2,5-bis(thiazol-2-yl)-1,4-dihydropyrrolo[3,2-*b*]pyrrole (3u)**

Beige solid. Yield: 55 mg (8%). <sup>1</sup>H NMR (500 MHz, CDCl<sub>3</sub>) δ 7.68 (d, *J* = 3.2 Hz, 2H), 7.45 (t, *J* = 1.6 Hz, 2H), 7.25 (d, *J* = 1.7 Hz, 4H), 7.07 (d, *J* = 3.2 Hz, 2H), 6.79 (s, 2H), 1.32 (s, 36H) ppm; <sup>13</sup>C NMR (126 MHz, CDCl<sub>3</sub>) δ 160.0, 152.1, 142.3, 137.7, 133.3, 132.0, 121.6, 121.4, 117.7, 95.0, 35.0, 31.4 ppm. HRMS (EI): *m/z* calculated for C<sub>40</sub>H<sub>48</sub>N<sub>4</sub>S<sub>2</sub>: 648.3320 [M<sup>+</sup>], found: 648.3314.

**2,5-Bis(benzo[*b*]thien-2-yl)-1,4-bis(4-methylphenyl)-1,4-dihydropyrrolo[3,2-*b*]pyrrole (3v)**

Orange solid. Yield: 255 mg (46%). <sup>1</sup>H NMR (500 MHz, CDCl<sub>3</sub>) δ 7.69 (d, *J* = 8.0 Hz, 2H), 7.54 (d, *J* = 8.1 Hz, 2H), 7.34 (d, *J* = 8.1 Hz, 4H), 7.25 (d, *J* = 8.1 Hz, 4H), 7.26 - 7.17 (m, 4H), 6.77 (s, 2H), 6.45 (s, 2H), 2.44 (s, 6H) ppm; <sup>13</sup>C NMR (126 MHz, CDCl<sub>3</sub>) δ 140.3, 139.0, 136.9,

136.8, 135.8, 132.8, 130.2, 130.0, 126.1, 124.2, 123.7, 123.1, 121.8, 120.2, 95.0, 21.2 ppm. HRMS (EI):  $m/z$  calculated for  $C_{36}H_{26}N_2S_2$ : 550.1537 [ $M^+$ ], found: 550.1542.

**2,5-Bis(benzo[b]thien-2-yl)-1,4-bis(3,5-di-*tert*-butylphenyl)-1,4-dihydropyrrolo[3,2-*b*]pyrrole (3w)**

Yellow solid. Yield: 87 mg (12%).  $^1H$  NMR (500 MHz,  $CDCl_3$ )  $\delta$  7.69 (d,  $J = 7.5$  Hz, 2H), 7.50 (d,  $J = 7.2$  Hz, 2H), 7.40 (bs, 2H), 7.31 (d,  $J = 1.6$  Hz, 4H), 7.26 – 7.18 (m, 4H), 6.72 (s, 2H), 6.51 (s, 2H), 1.29 (s, 36H) ppm;  $^{13}C$  NMR (126 MHz,  $CDCl_3$ )  $\delta$  151.9, 140.3, 139.0, 138.4, 135.8, 132.3, 130.0, 124.2, 123.7, 122.9, 121.6, 120.6, 120.5, 120.4, 94.9, 35.0, 31.3 ppm. HRMS (EI):  $m/z$  calculated for  $C_{50}H_{54}N_2S_2$ : 746.3728 [ $M^+$ ], found: 746.3734.

**2,5-Bis(benzo[b]fur-2-yl)-1,4-bis(3,5-di-*tert*-butylphenyl)-1,4-dihydropyrrolo[3,2-*b*]pyrrole (3x)**

Yellow solid. Yield: 150 mg (21%).  $^1H$  NMR (500 MHz,  $CDCl_3$ )  $\delta$  7.49 (b s, 2H), 7.40 – 7.35 (m, 6H), 7.32 (d,  $J = 7.3$  Hz, 2H), 7.21 – 7.14 (m, 2H), 7.14 – 7.08 (m, 2H), 6.70 (s, 2H), 5.95 (s, 2H), 1.36 (s, 36H) ppm;  $^{13}C$  NMR (126 MHz,  $CDCl_3$ )  $\delta$  153.9, 152.1, 149.9, 138.7, 133.2, 129.3, 127.9, 123.5, 122.7, 121.1, 120.9, 120.2, 110.6, 101.3, 93.7, 35.1, 31.5 ppm. HRMS (EI):  $m/z$  calculated for  $C_{50}H_{54}N_2O_2$ : 714.4185 [ $M^+$ ], found: 714.4178.

**1,4-Bis(4-methylphenyl)-2,5-bis(quinoxalin-2-yl)-1,4-dihydropyrrolo[3,2-*b*]pyrrole (3y)**

Brown solid. Yield: 214 mg (39%).  $^1H$  NMR (500 MHz,  $CDCl_3$ )  $\delta$  8.65 (s, 2H), 7.96 (d,  $J = 8.1$  Hz, 2H), 7.84 (d,  $J = 8.2$  Hz, 2H), 7.70 – 7.59 (m, 4H), 7.31, 7.25 (AA'BB',  $J = 8.1$ , 8H), 7.00 (s, 2H), 2.42 ppm (s, 6H);  $^{13}C$  NMR (126 MHz,  $CDCl_3$ )  $\delta$  146.8, 144.6, 142.3, 140.2, 137.3, 136.8, 135.3, 134.9, 130.1 (2), 129.0 (2), 128.8, 125.6, 97.7, 21.1 ppm. HRMS (EI):  $m/z$  calculated for  $C_{36}H_{26}N_6$ : 542.2219 [ $M^+$ ], found: 542.2233.

**1,4-Bis(3,5-di-*tert*-butylphenyl)-2,5-bis(quinoxalin-2-yl)-1,4-dihydropyrrolo[3,2-*b*]pyrrole (3z)**

Orange solid. Yield: 125 mg (17%).  $^1H$  NMR (500 MHz,  $CDCl_3$ )  $\delta$  8.58 (s, 2H), 7.97 – 7.92 (m, 2H), 7.88 (d,  $J = 8.2$  Hz, 2H), 7.70 – 7.65 (m, 2H), 7.63 (td,  $J_1 = 7.3$  Hz,  $J_2 = 1.3$  Hz, 2H), 7.39 (t,  $J = 1.5$  Hz, 2H), 7.22 (d,  $J = 1.6$  Hz, 4H), 7.01 (s, 2H), 1.25 (s, 36H) ppm;  $^{13}C$  NMR (126 MHz,  $CDCl_3$ )  $\delta$  152.36, 147.01, 144.83, 142.18, 140.05, 139.01, 135.19, 134.53, 129.94, 129.01, 128.88, 128.76, 120.57, 120.05, 97.48, 34.94, 31.32 ppm. HRMS (EI):  $m/z$  calculated for  $C_{50}H_{54}N_6$ : 738.4410 [ $M^+$ ], found: 738.4415.

**2,5-Bis(4-cyanophenyl)-1,4-bis(4-methylphenyl)-3,6-dimethyl-1,4-dihydropyrrolo[3,2-*b*]pyrrole (3ab)**

Yellow solid. Yield 19 mg (4%).  $^1H$  NMR (500 MHz,  $CDCl_3$ )  $\delta$  7.47 (d,  $J = 8.2$  Hz, 4H), 7.17 (d,  $J = 8.2$  Hz, 4H), 7.08–7.14 (m, 8H), 2.36 (s, 6H), 1.99 (s, 6H) ppm;  $^{13}C$  NMR (126 MHz,  $CDCl_3$ ):  $\delta = 137.4, 136.8, 136.2, 133.3, 131.5, 131.1, 130.6, 129.4, 128.2, 127.6, 109.1, 103.4, 21.1, 10.6$  ppm. HRMS (EI):  $m/z$  calculated for  $C_{36}H_{28}N_4$ : 516.2314 [ $M^+$ ]; found 516.2321.

**1,4-Bis(4-*tert*-butylphenyl)-2,5-bis(2,6-dichlorophenyl)-1,4-dihydropyrrolo[3,2-*b*]pyrrole (3aa)**

White solid. Yield: 453 mg (69%).  $^1H$  NMR (500 MHz,  $CDCl_3$ )  $\delta$  7.30 (d,  $J = 8.1$  Hz, 4H), 7.23 – 7.26 (m, 4H), 7.14 – 7.20 (m, 6H), 6.33 (s, 2H), 1.28 (s, 18H) ppm;  $^{13}C$  NMR (126 MHz,  $CDCl_3$ )  $\delta$  147.9, 137.6, 137.2, 132.9, 129.5 (2), 128.3, 127.8, 125.6, 122.9, 96.2, 34.4, 31.4 ppm. HRMS (EI):  $m/z$  calculated for  $C_{38}H_{34}N_2Cl_4$ : 658.1476 [ $M^+$ ], found: 658.1461.

**1,4-Bis(4-*tert*-butylphenyl)-2,5-bis(2,6-dichlorophenyl)-1,2,3,4-tetrahydropyrrolo[3,2-*b*]pyrrole (4aa)**

In a 25 mL round-bottom flask equipped with a reflux condenser and magnetic stir bar, glacial acid (2mL) was placed followed by 4-*tert*-butylaniline (**2k**, 2 mmol, 314  $\mu$ L), 2,6-dichlorobenzaldehyde (**1r**, 2 mmol, 350 mg), and TsOH (0.2 mmol, 34 mg). The mixture was stirred at 90°C for 30 min. After that time, butane-2,3-dione (1 mmol, 88  $\mu$ L) was slowly added via syringe and the resulting mixture was stirred at 90°C for 3 h. After cooling the precipitate of the product were filtered off and washed with CH<sub>3</sub>CN, to afford 530 mg (80% yield) of the title compound contaminated with the compound **3aa** (yellowish solid). <sup>1</sup>H NMR (500 MHz, CDCl<sub>3</sub>)  $\delta$  7.36 – 7.28 (m, 2H), 7.25 – 7.13 (m, 7H), 7.13 – 7.08 (t, *J*=8.0, 1H), 7.03 (d, *J*= 8.6, 2H), 6.86 (d, *J*= 8.2, 2H), 6.39 (bs, 1H), 6.26 (s, 1H), 3.74 (t, *J*= 12.8, 1H), 3.14 – 2.94 (m, 1H), 1.24 (s, 9H), 1.24 (s, 9H) ppm; <sup>13</sup>C NMR (126 MHz, CDCl<sub>3</sub>)  $\delta$  148.9, 147.9, 143.7, 140.3, 138.0, 137.8, 137.8, 137.6, 137.5, 137.2, 136.2, 136.1, 134.3, 132.9, 132.6, 130.8, 129.6, 129.5, 128.7, 128.3, 128.1, 127.8, 127.7, 127.7, 127.0, 125.8, 125.6, 125.6, 123.7, 123.0, 122.0, 113.0, 100.3, 96.2, 67.4, 34.4, 34.4, 33.9, 32.7, 31.5, 31.4, 31.3 ppm. HRMS (EI): *m/z* calculated for C<sub>38</sub>H<sub>36</sub>N<sub>2</sub>Cl<sub>4</sub>: 660.1633 [*M*<sup>+</sup>], found: 660.1621.

### 1,4-Bis(4-*tert*-butylphenyl)-2,5-bis(2,6-dichlorophenyl)-1,4-dihydropyrrolo[3,2-*b*]pyrrole (**3aa**)

Compound **4aa** (0.8 mmol, 530 mg) was dissolved in toluene (7 mL) and DDQ (1.6 mmol, 363 mg) was added. The resulting mixture was stirred at 80 °C for 16 hours. The mixture was cooled to room temperature, evaporated and suspended in CH<sub>3</sub>CN. The precipitate was filtered, washed with AcOEt to give 497 mg (94% yield) of the desired product.

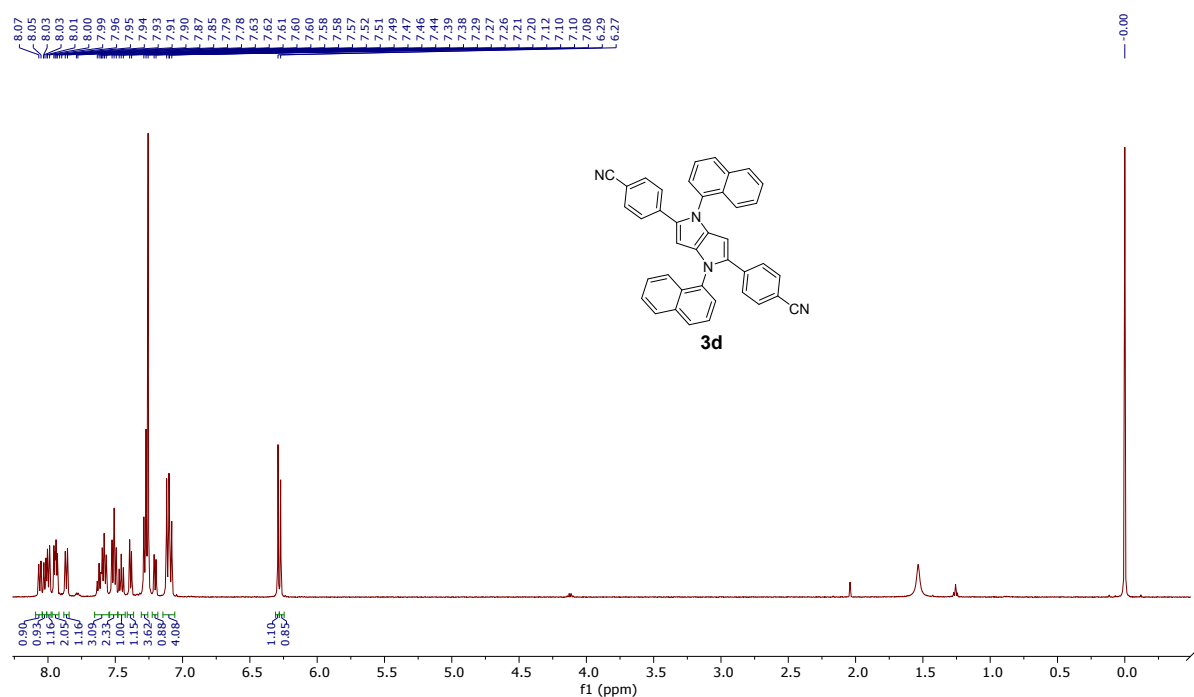

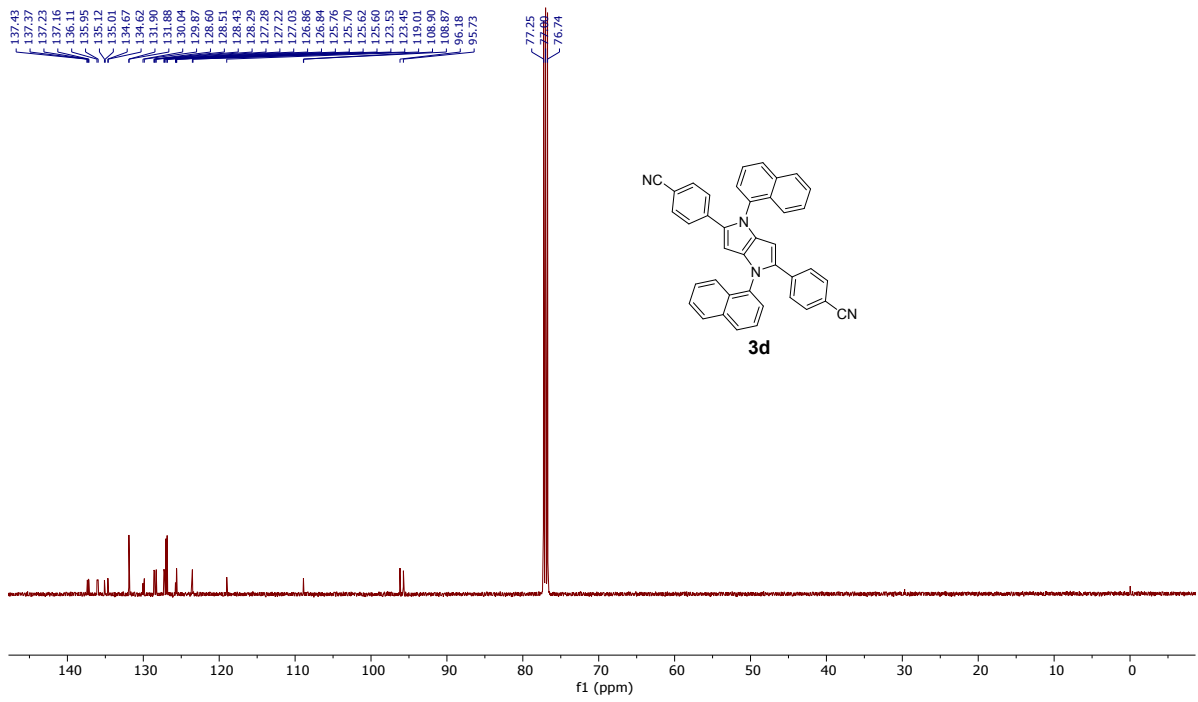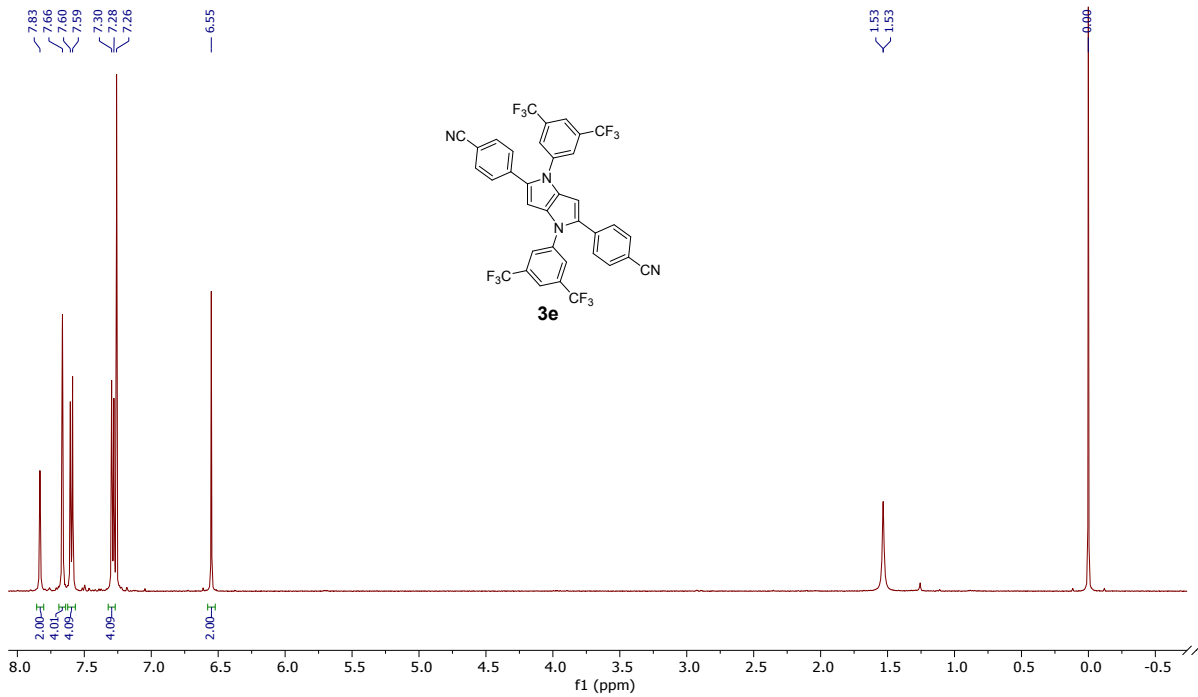

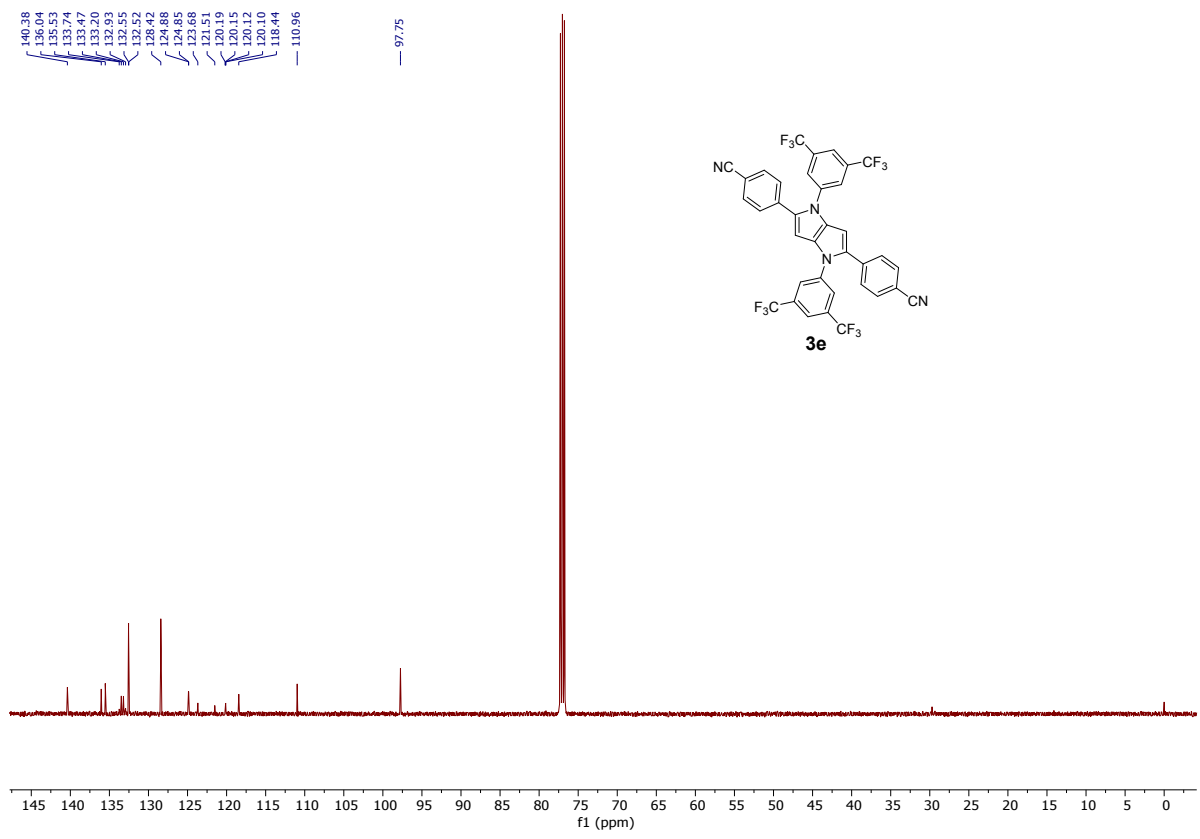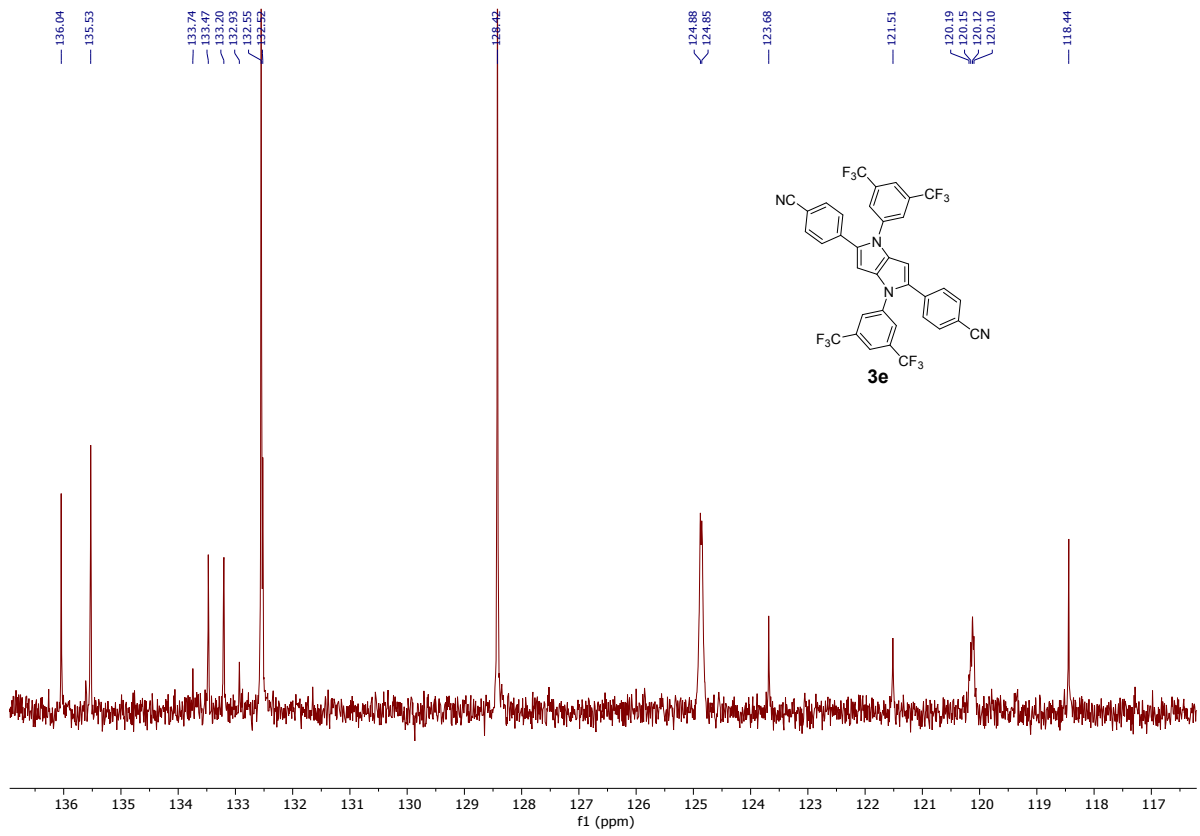

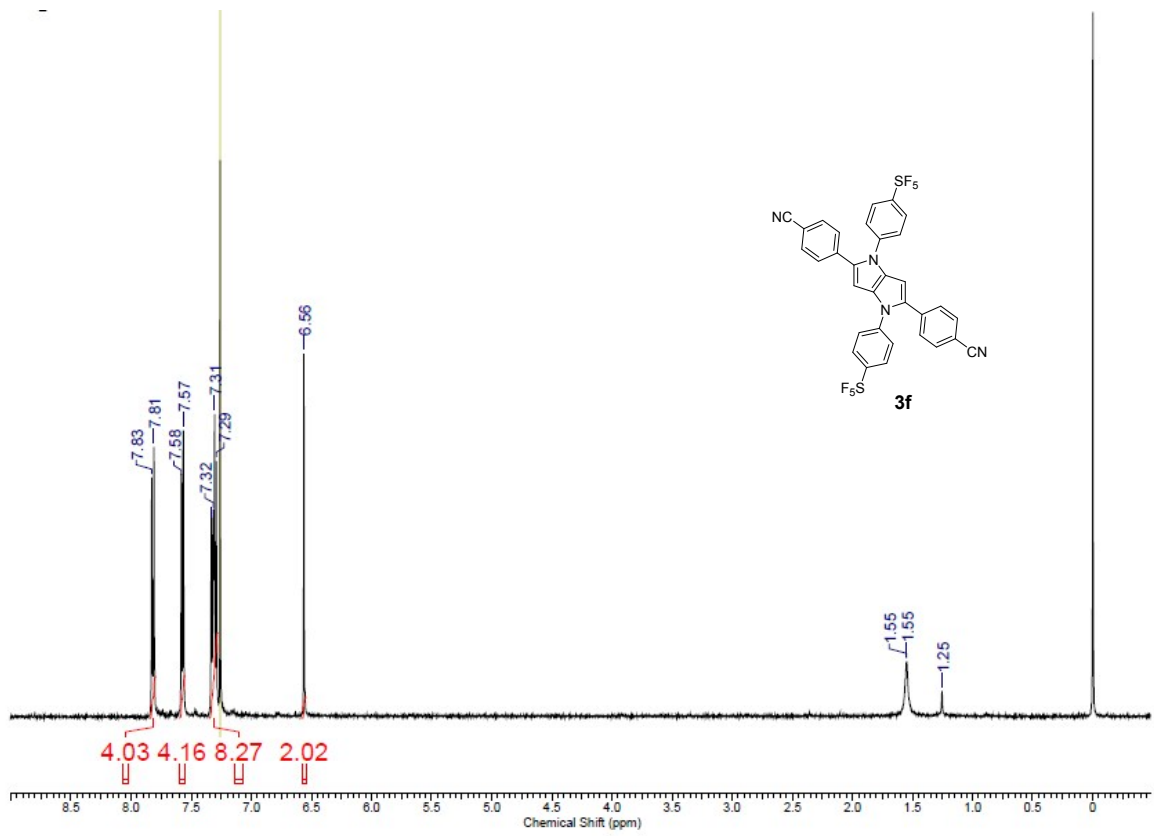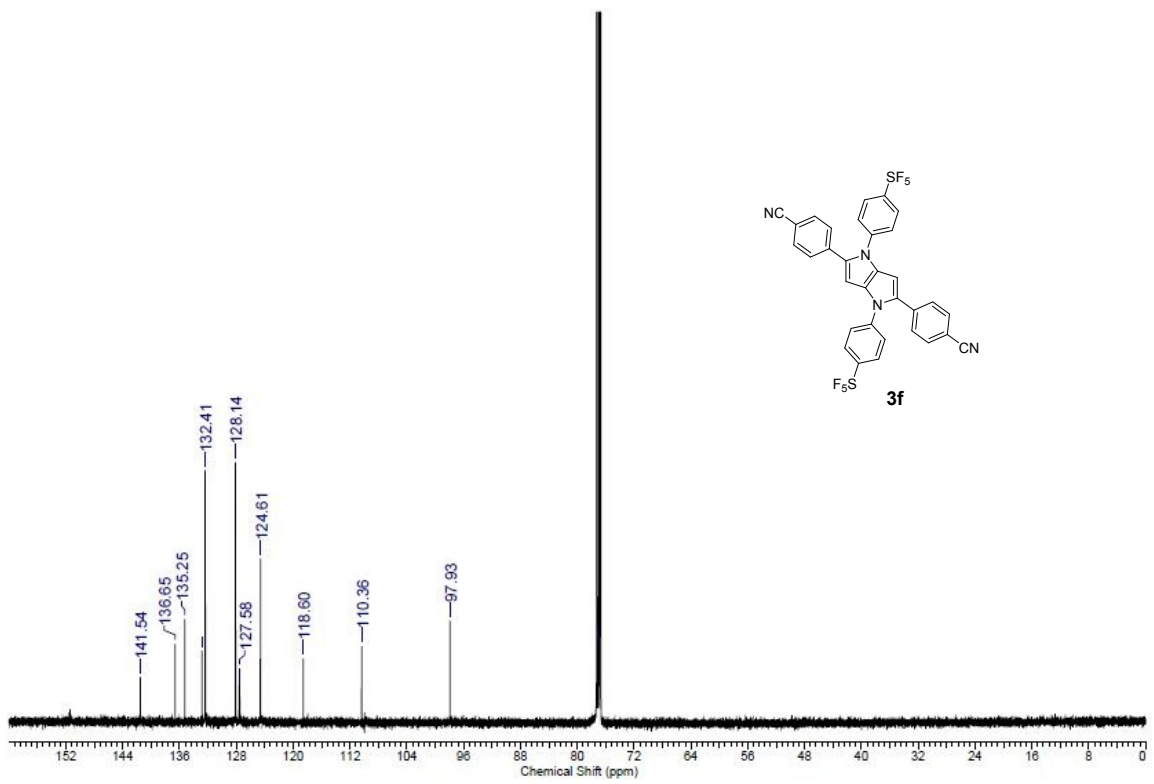



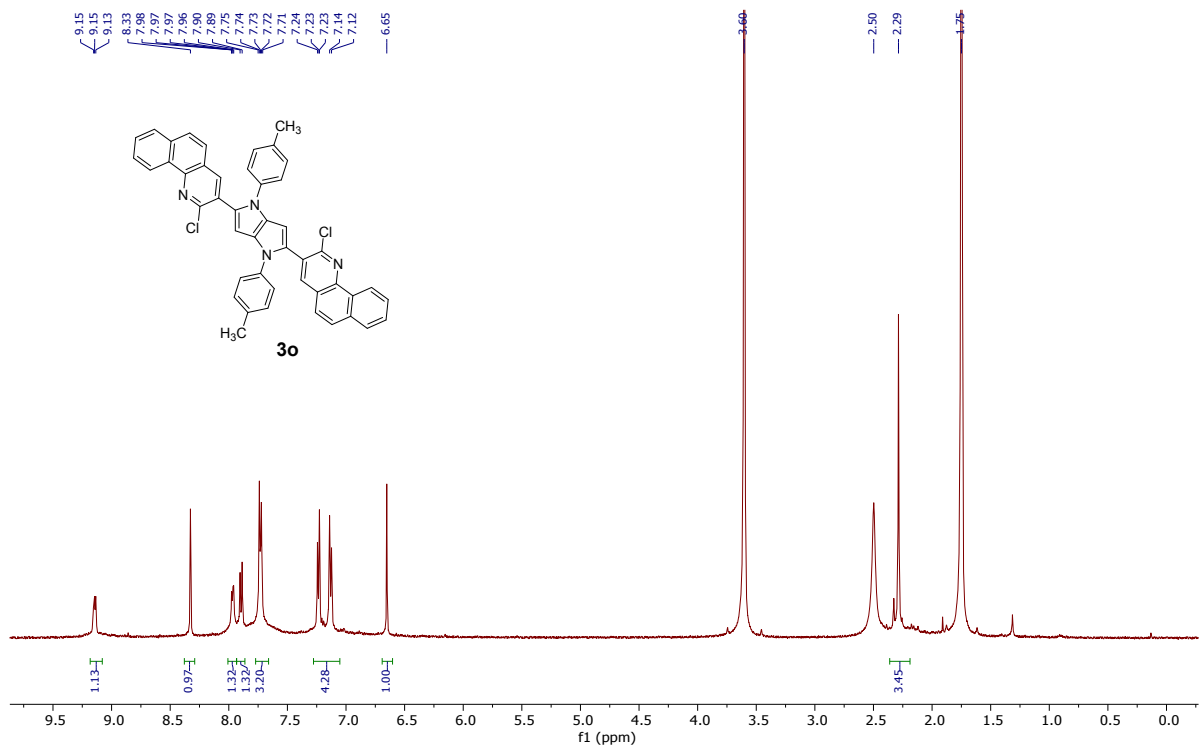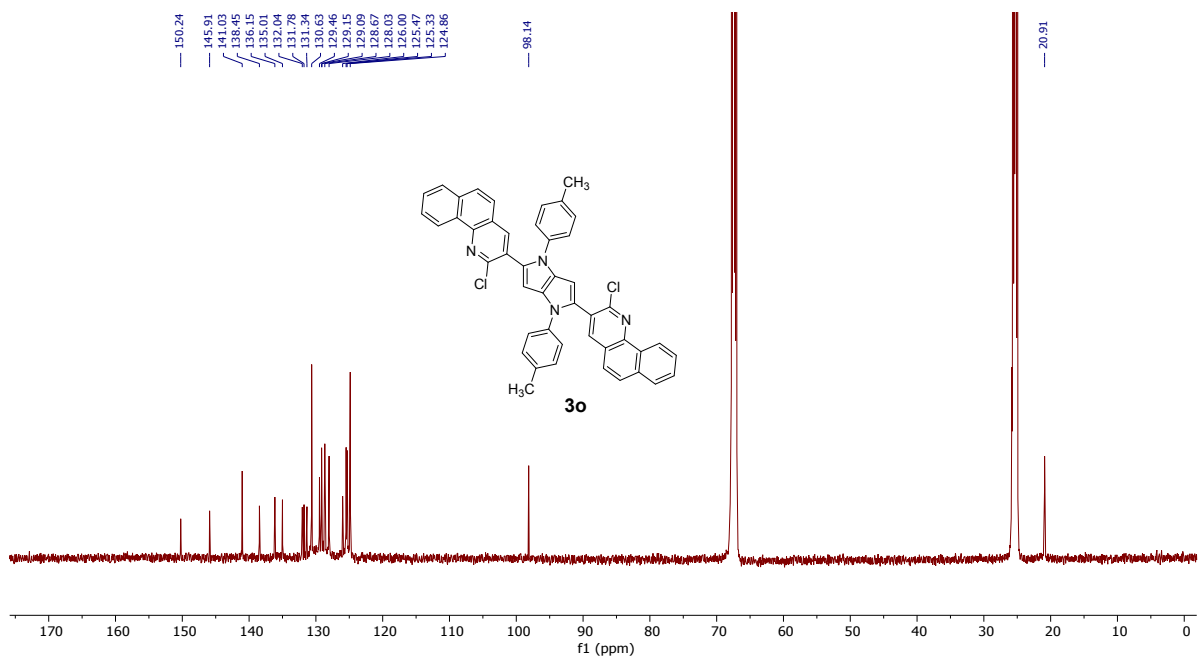

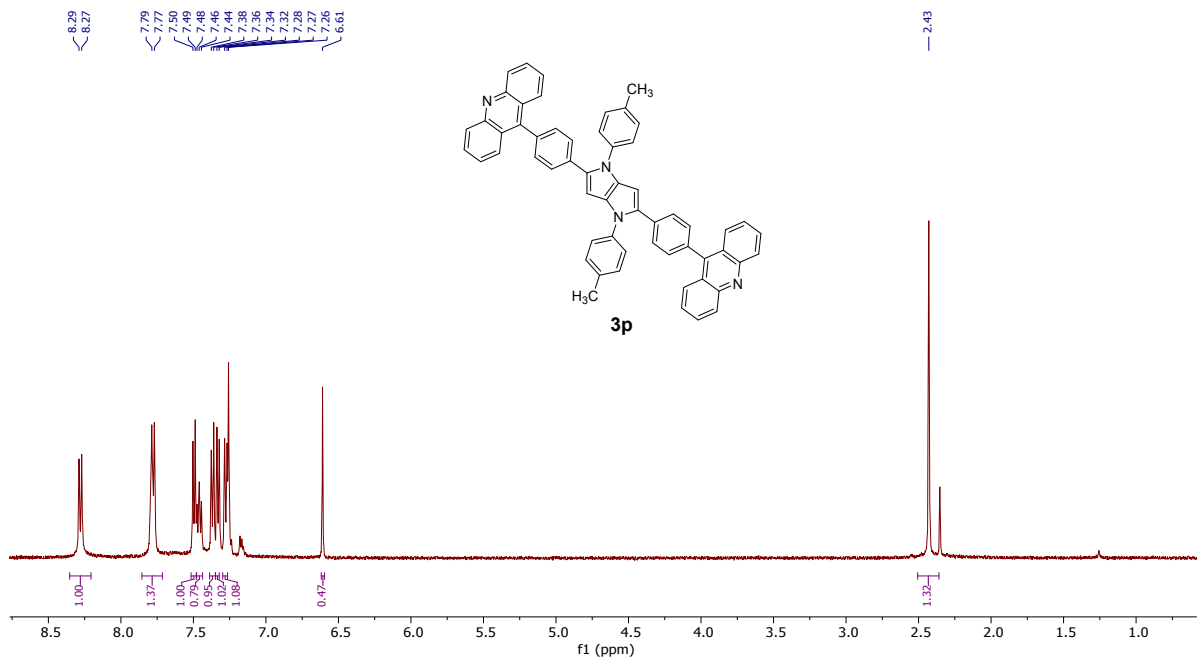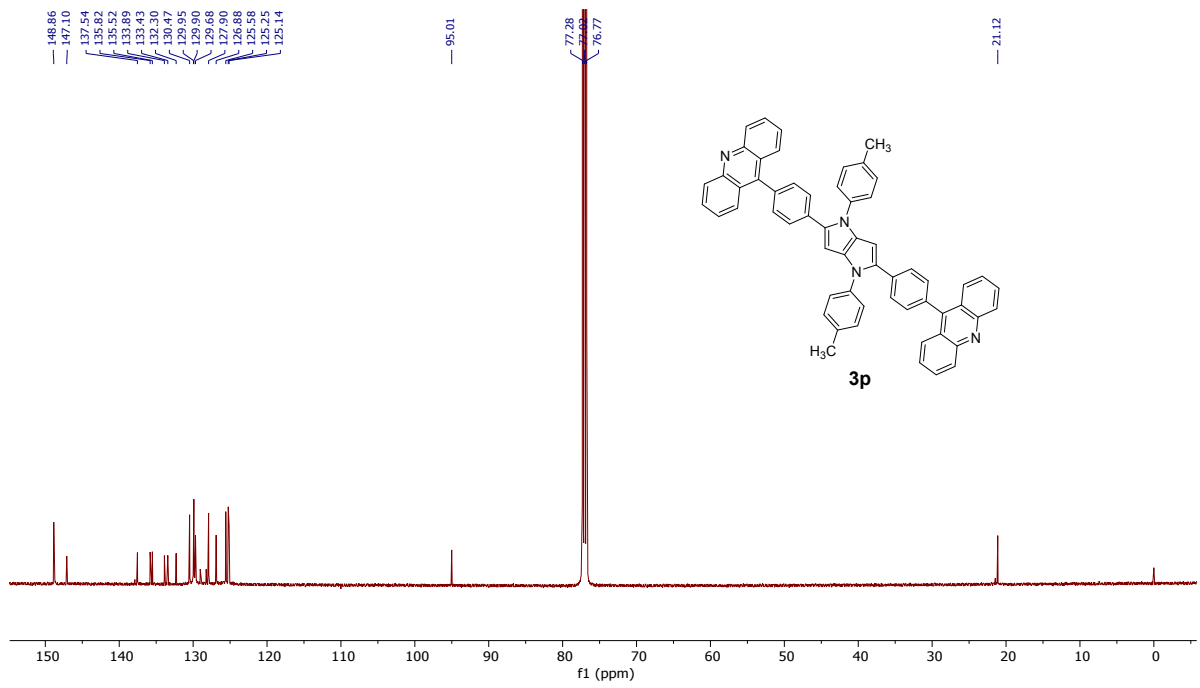

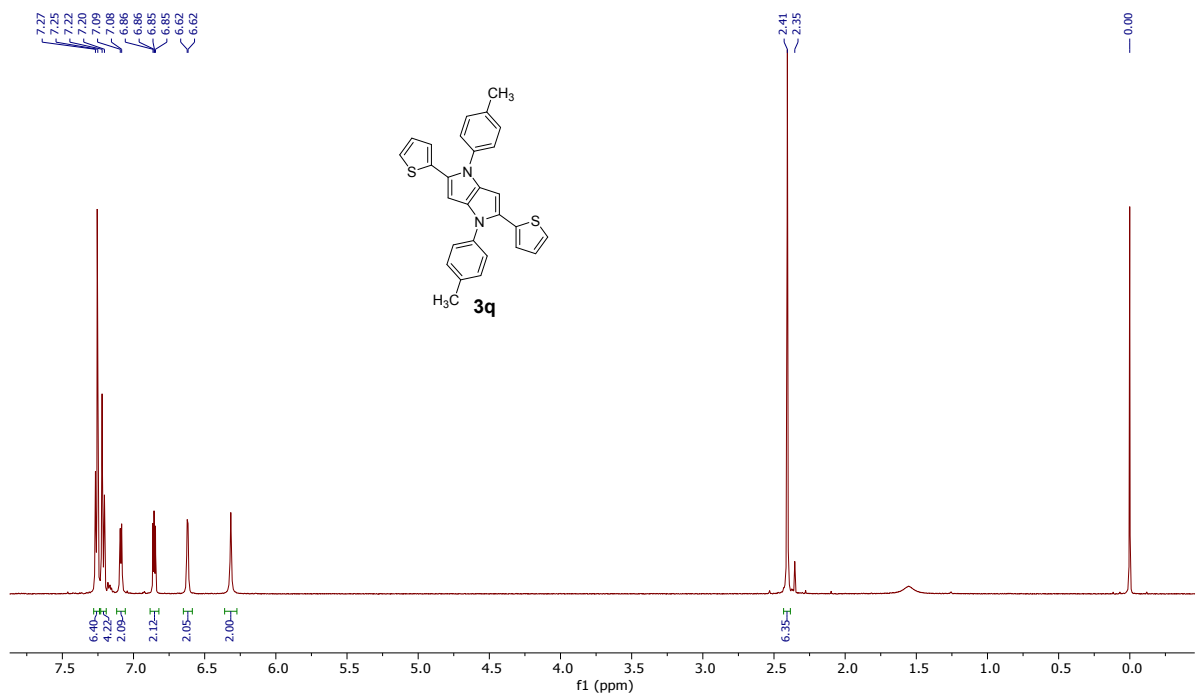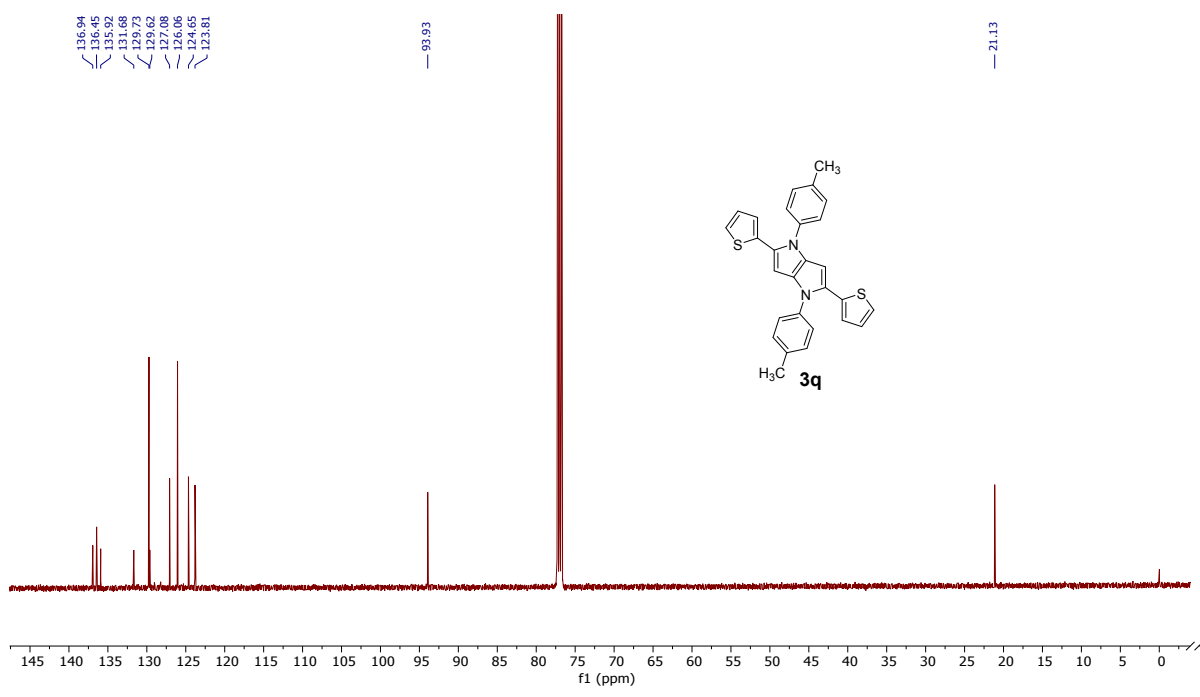

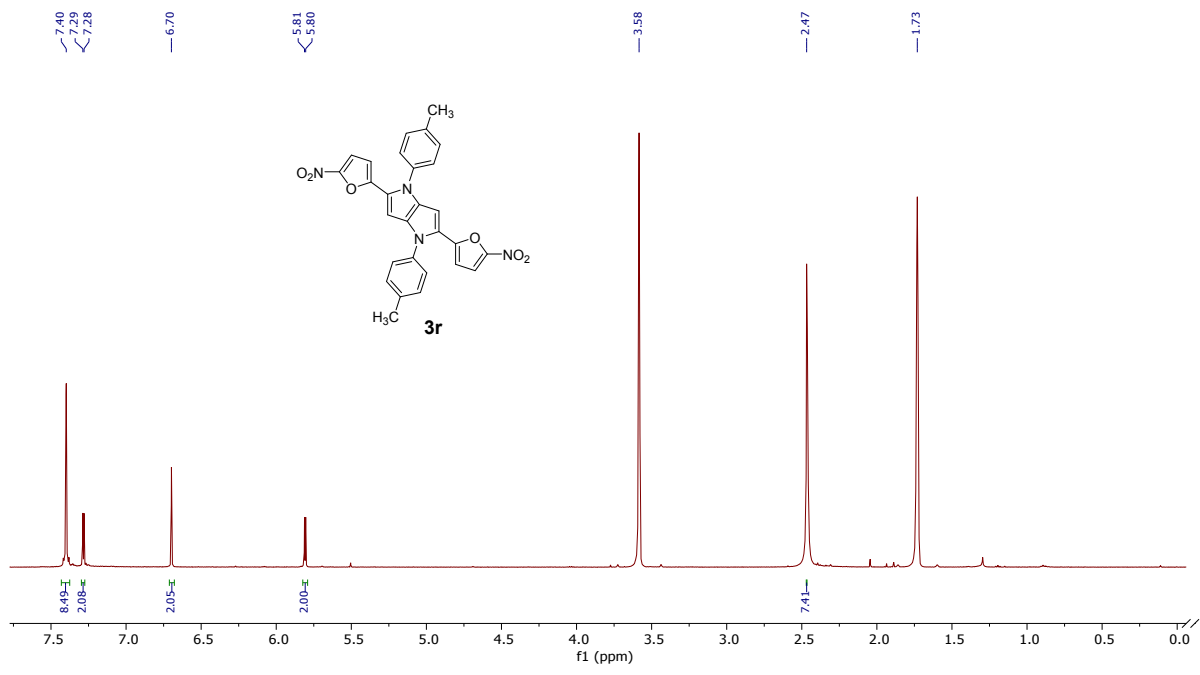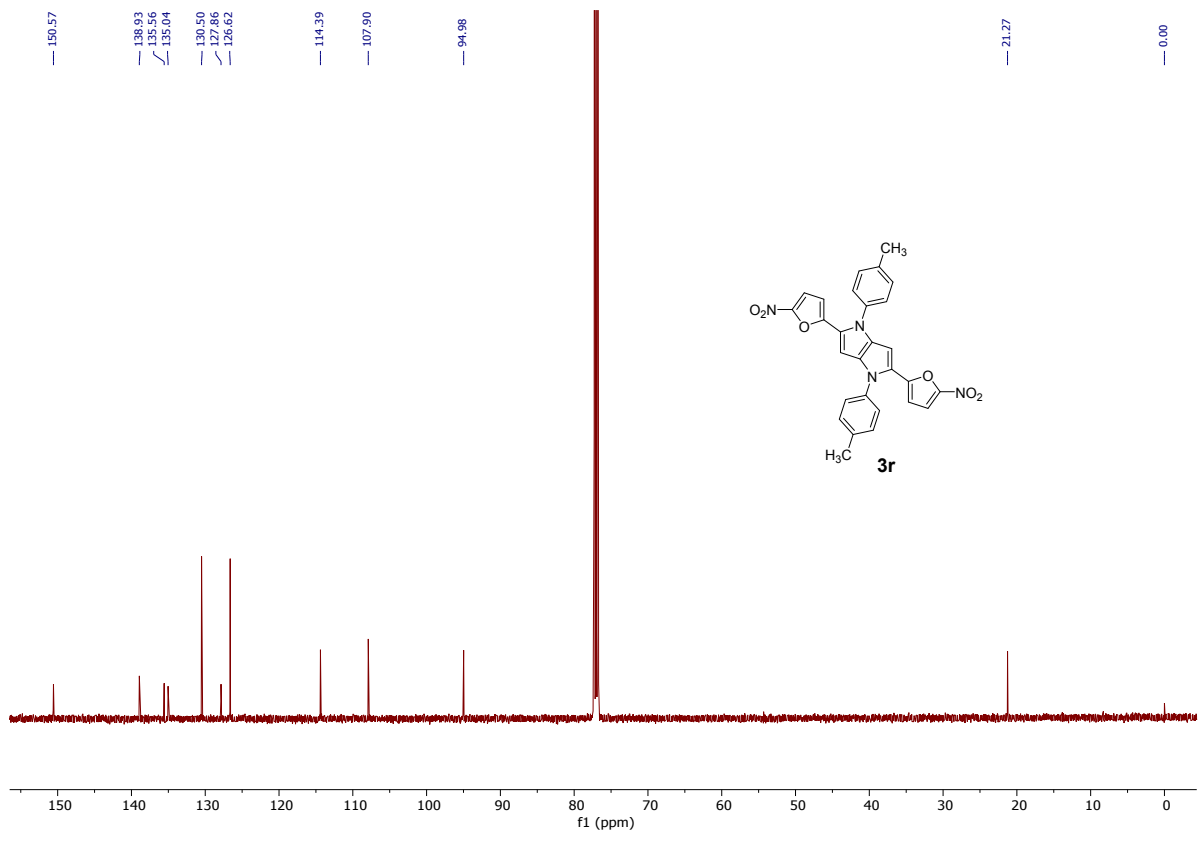

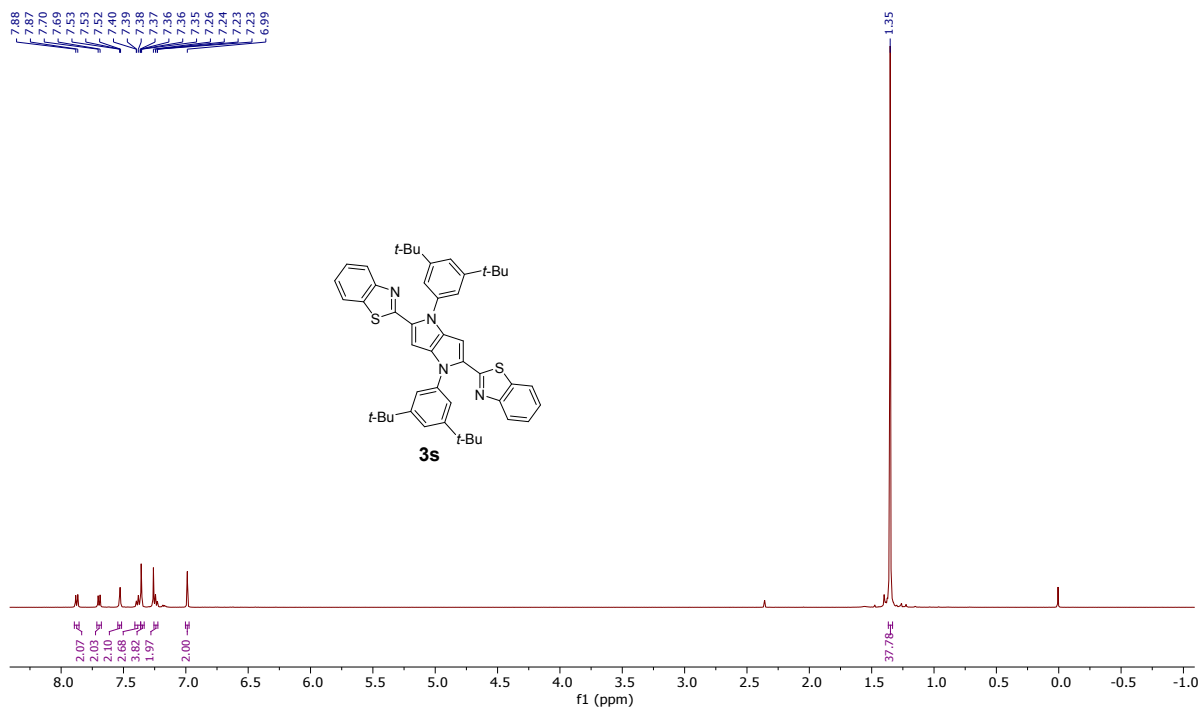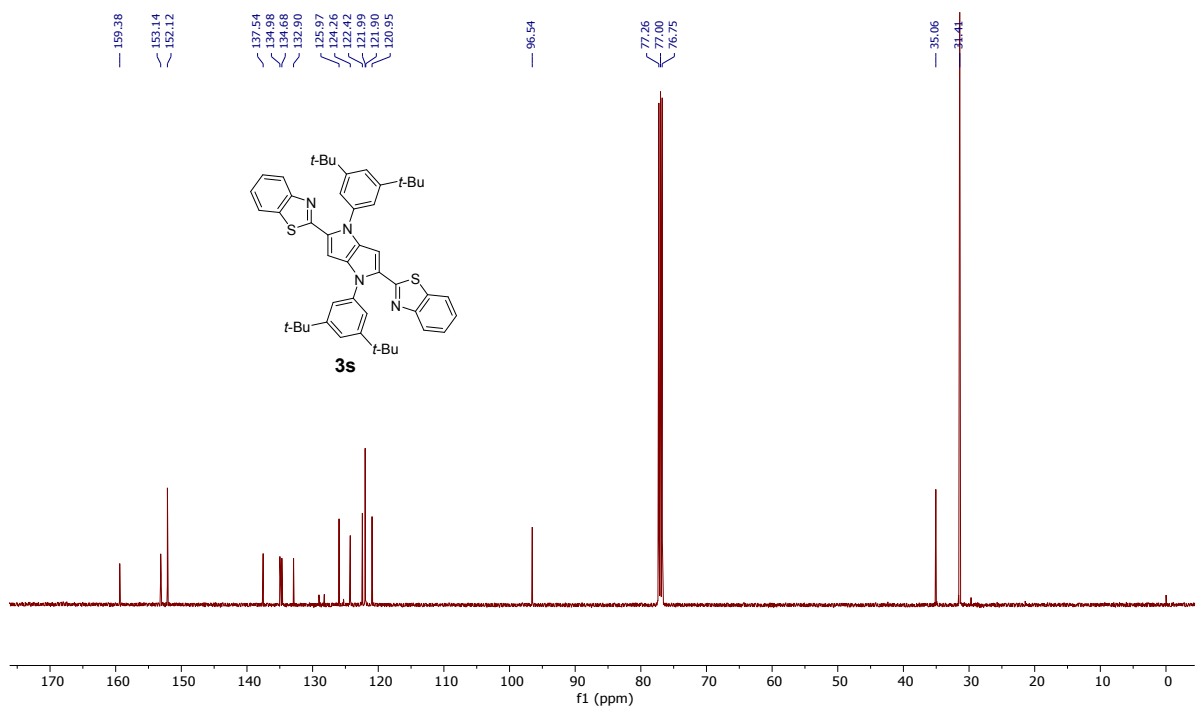

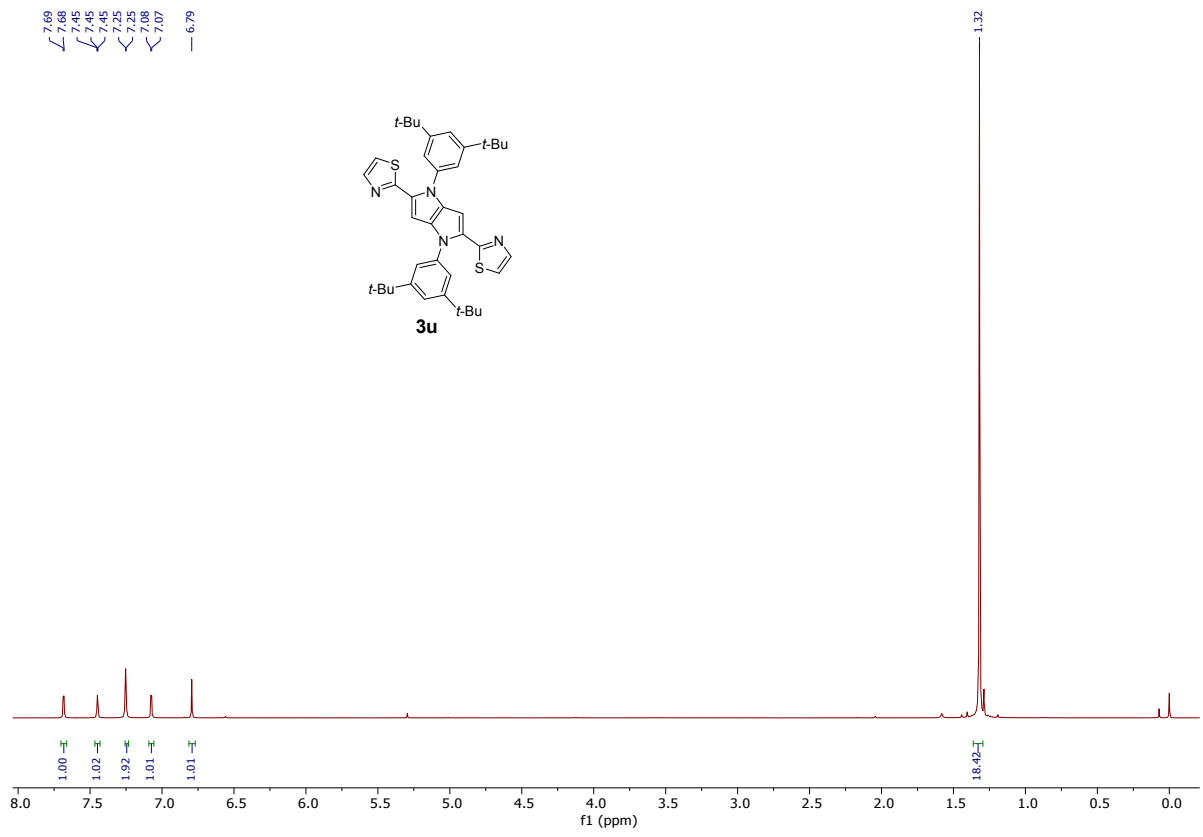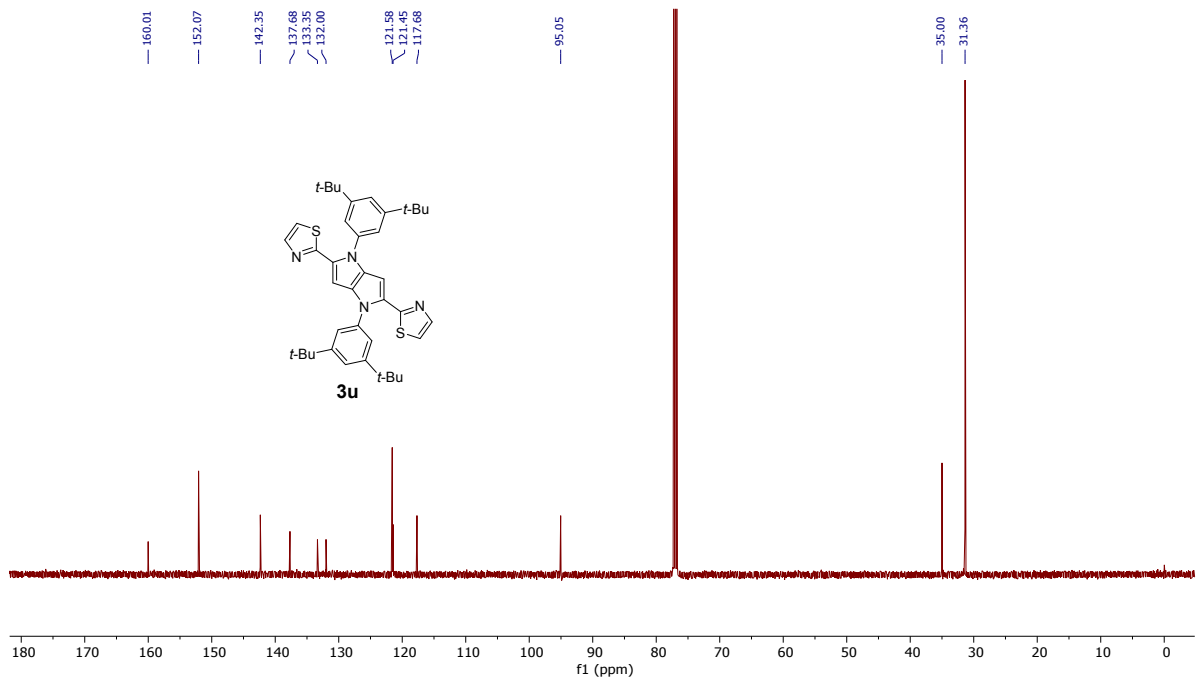

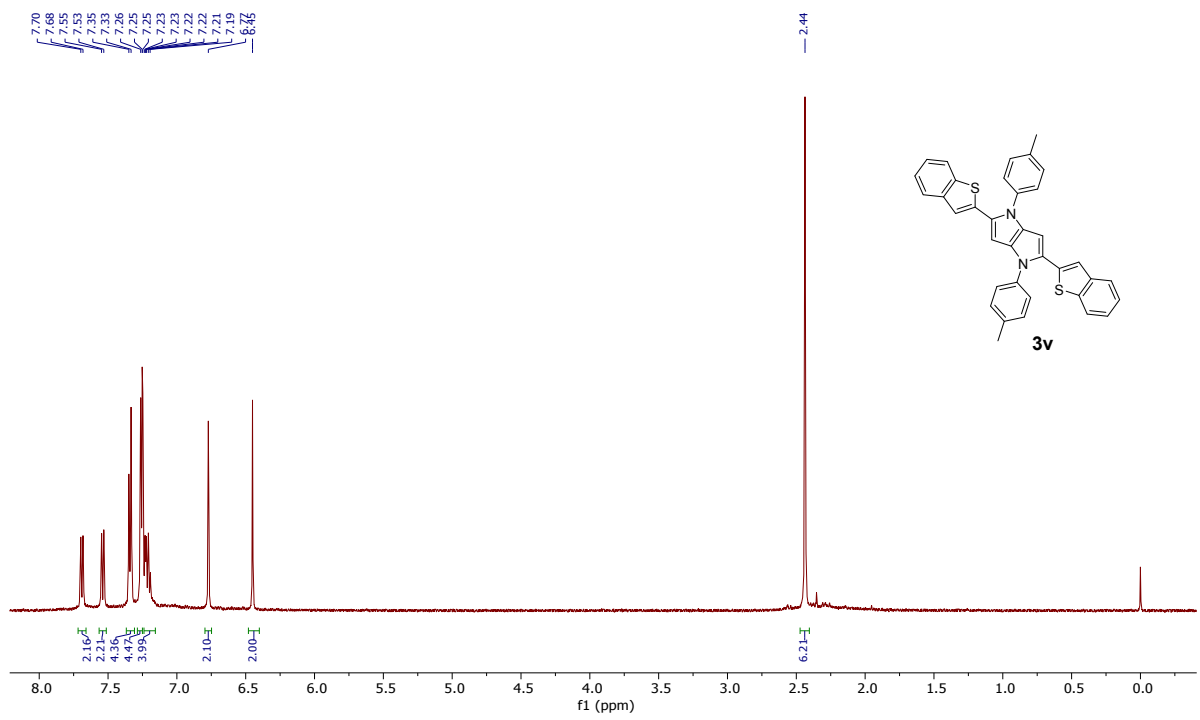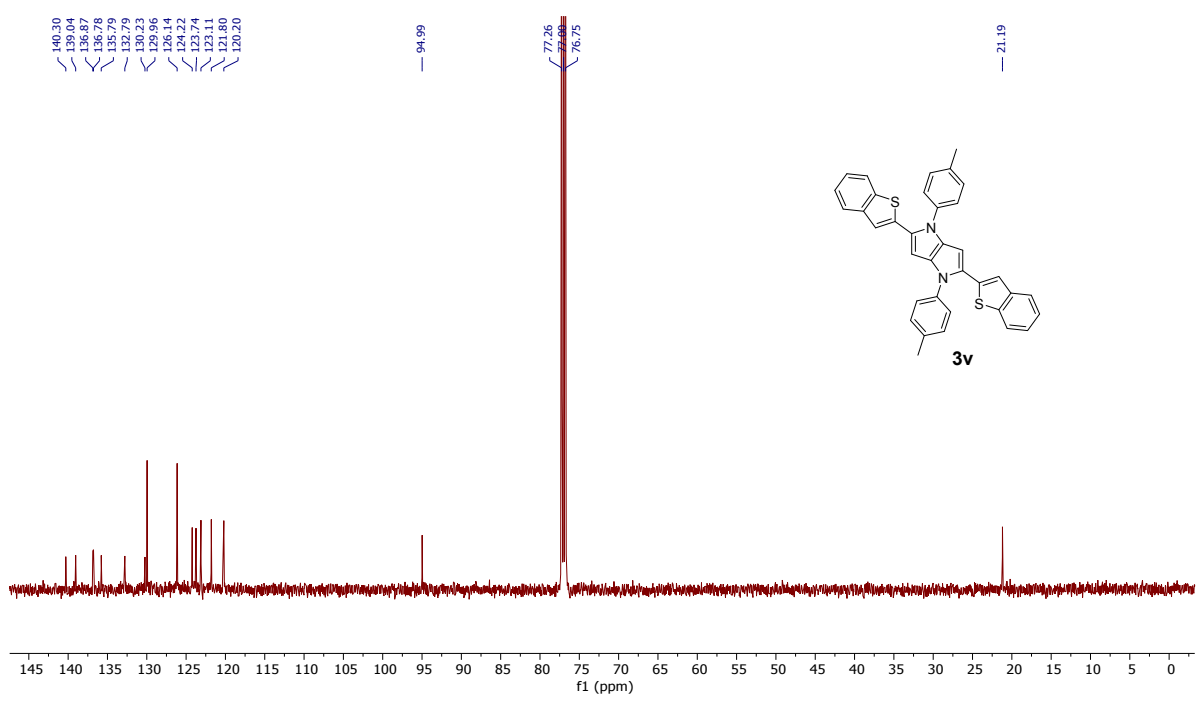

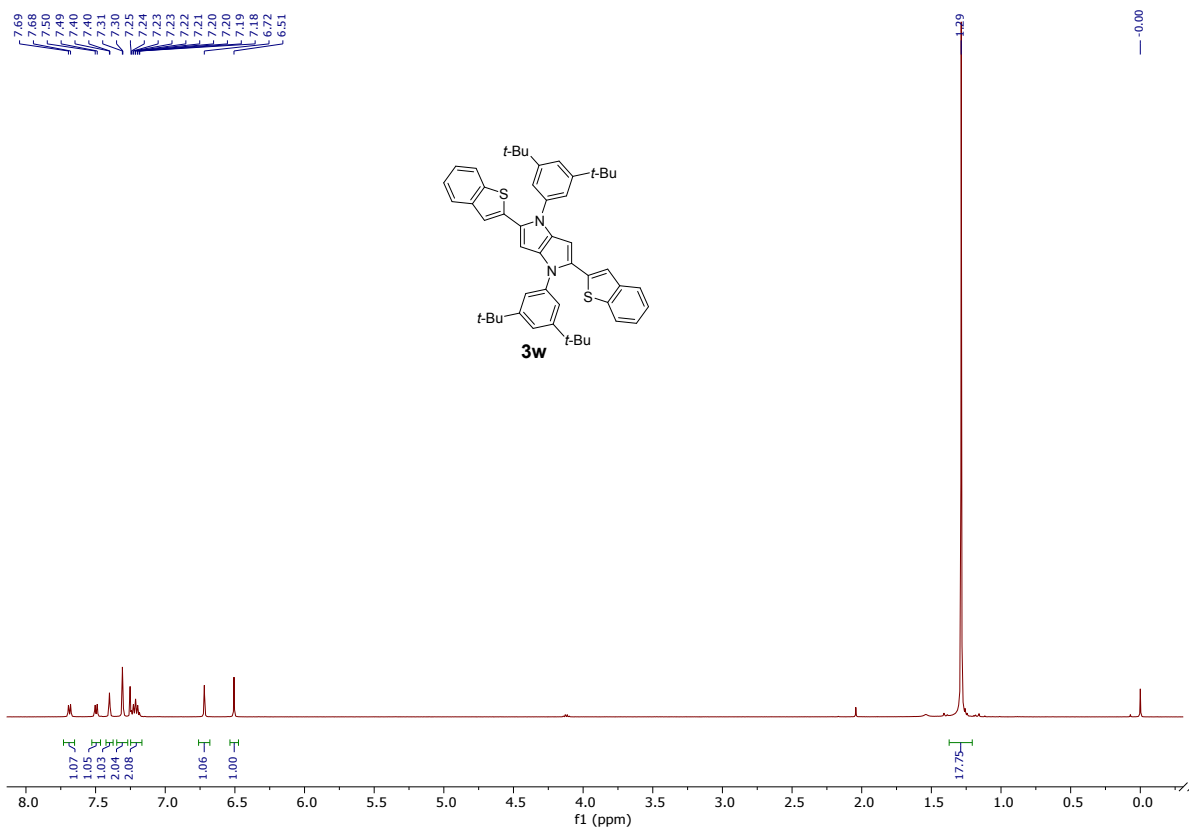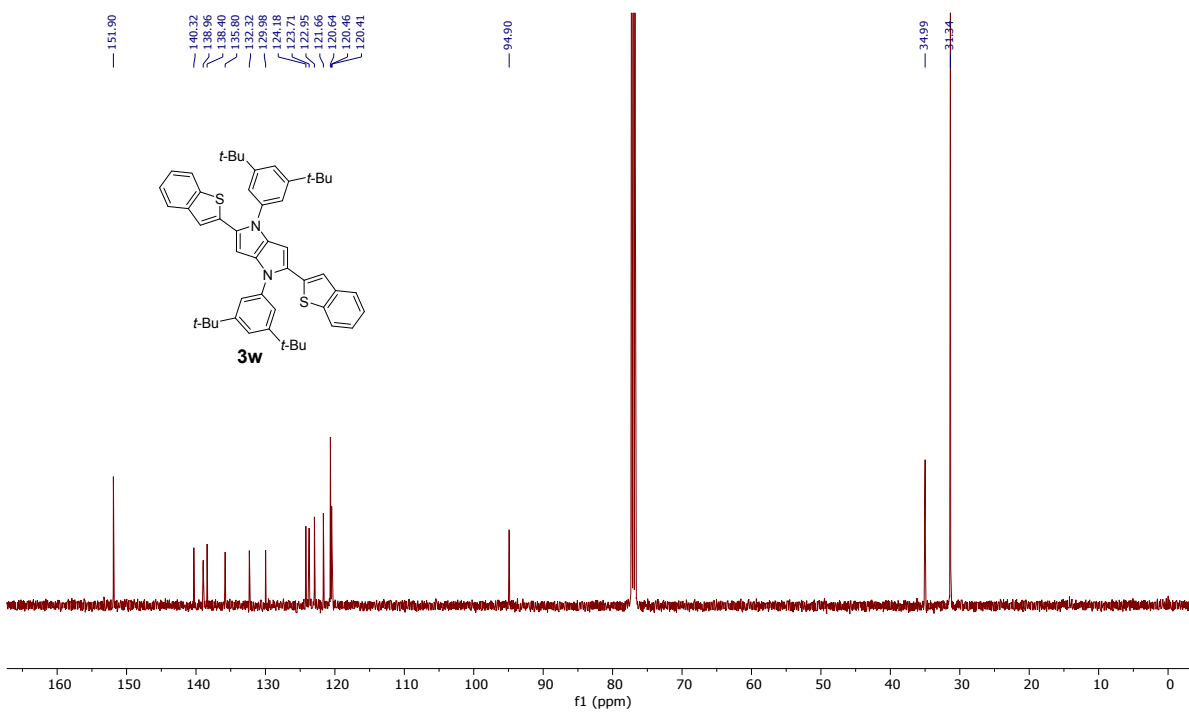



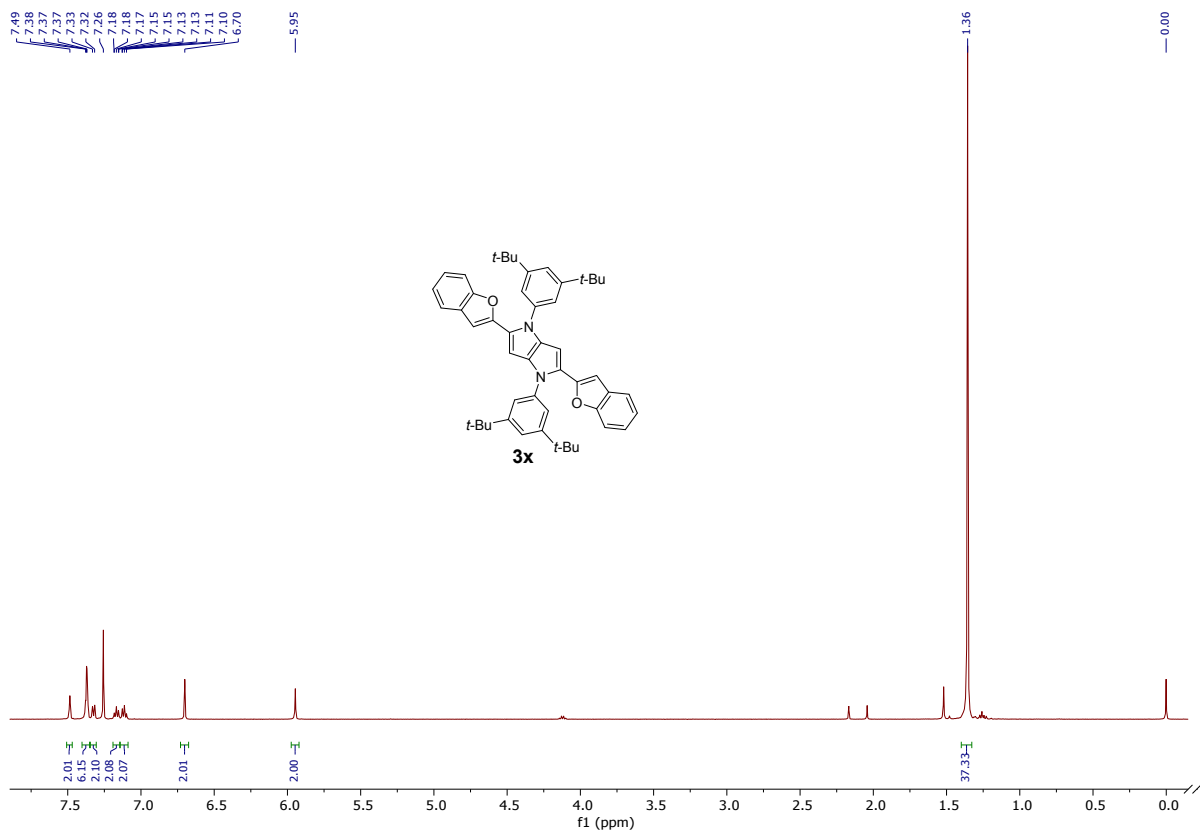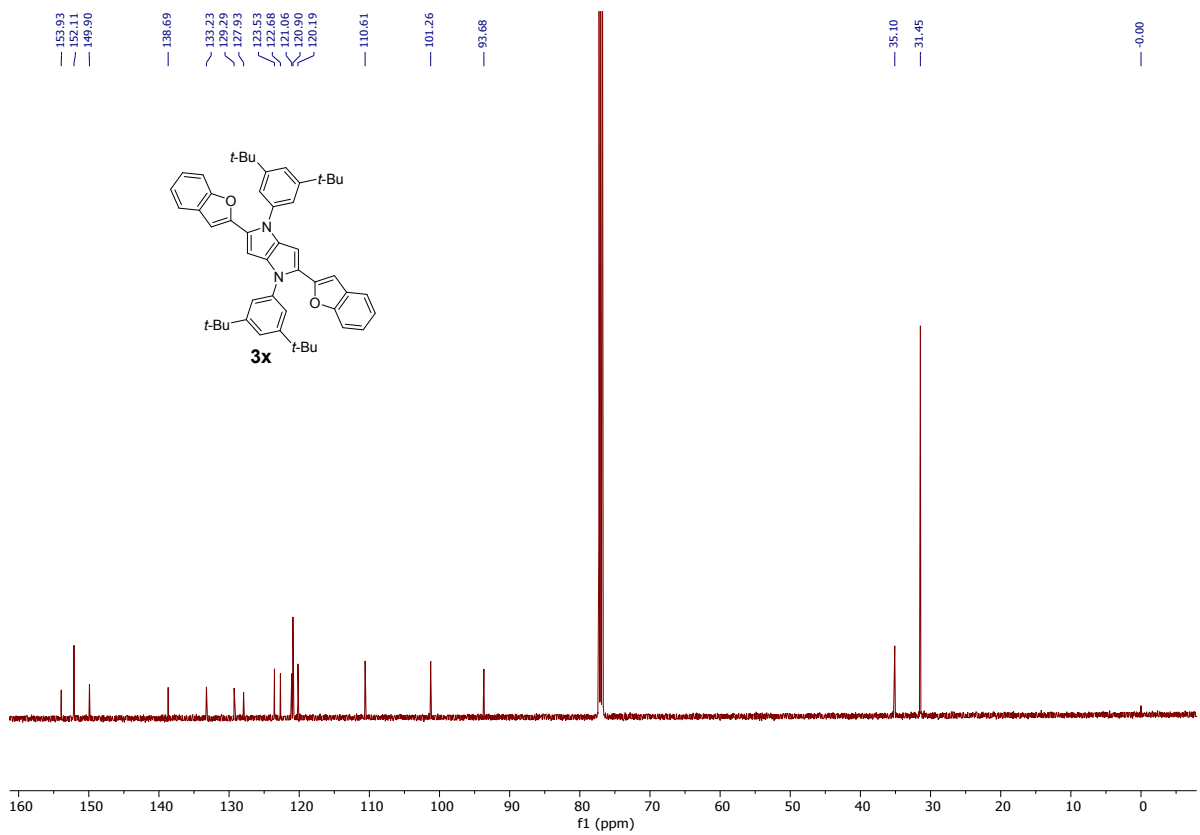

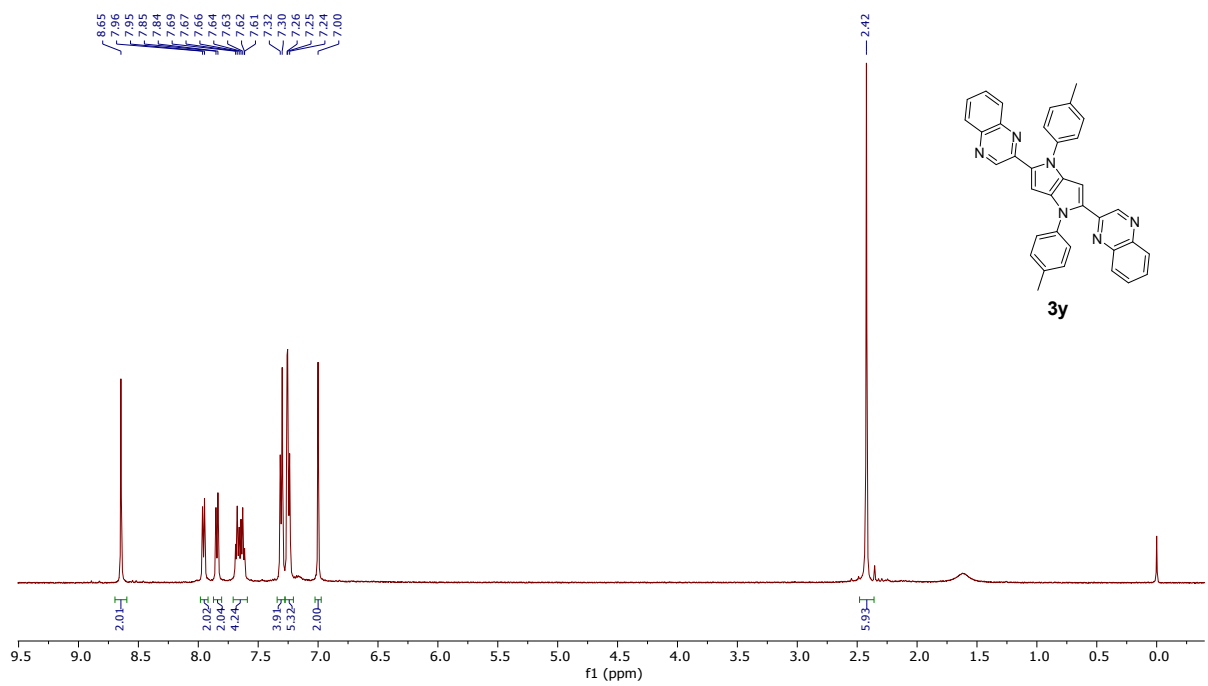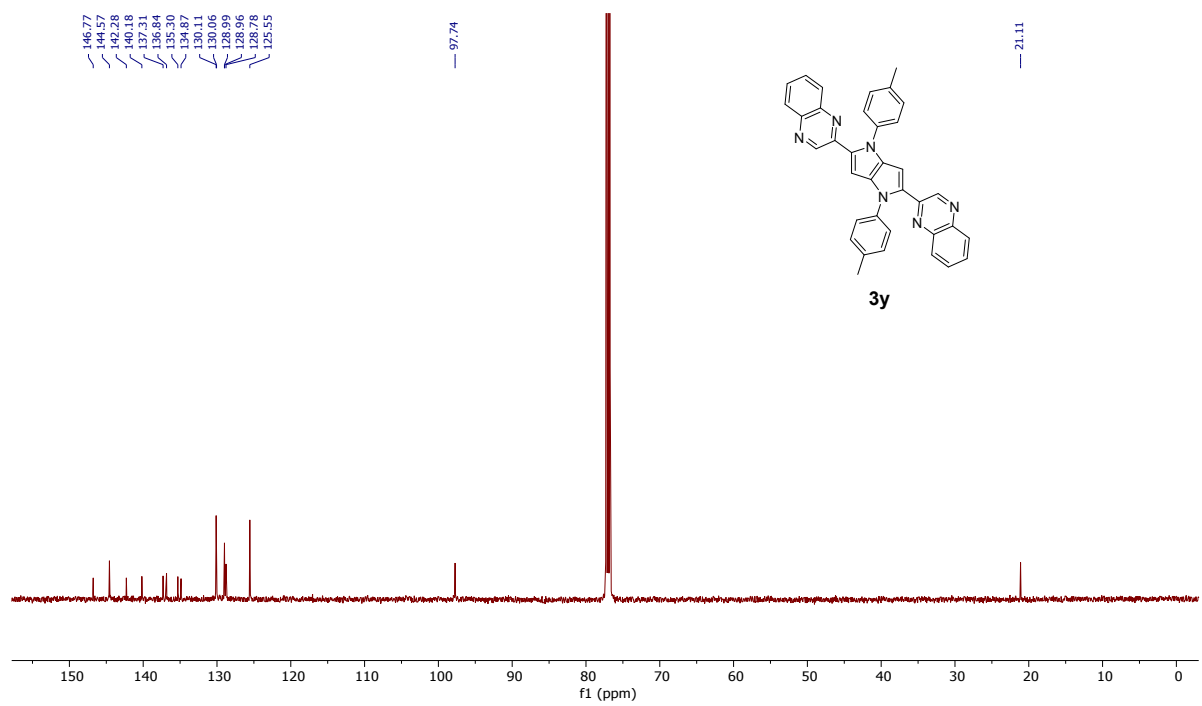

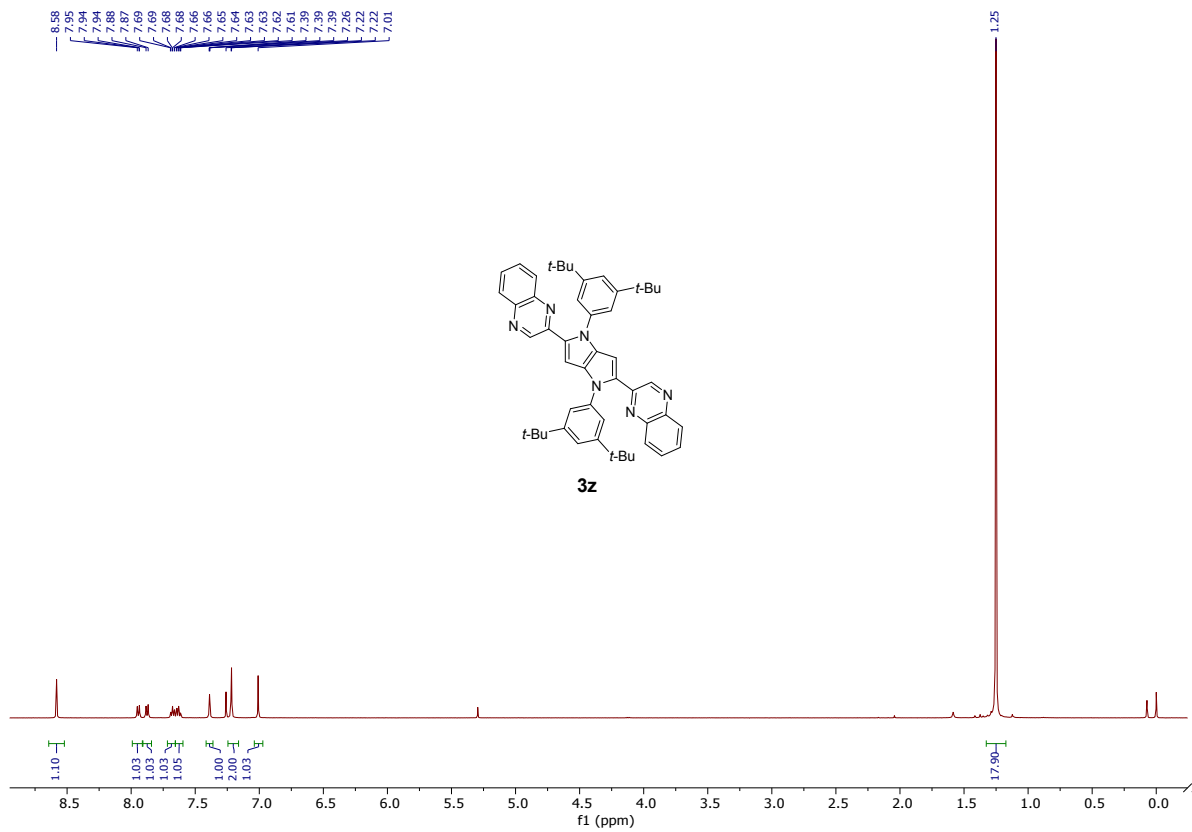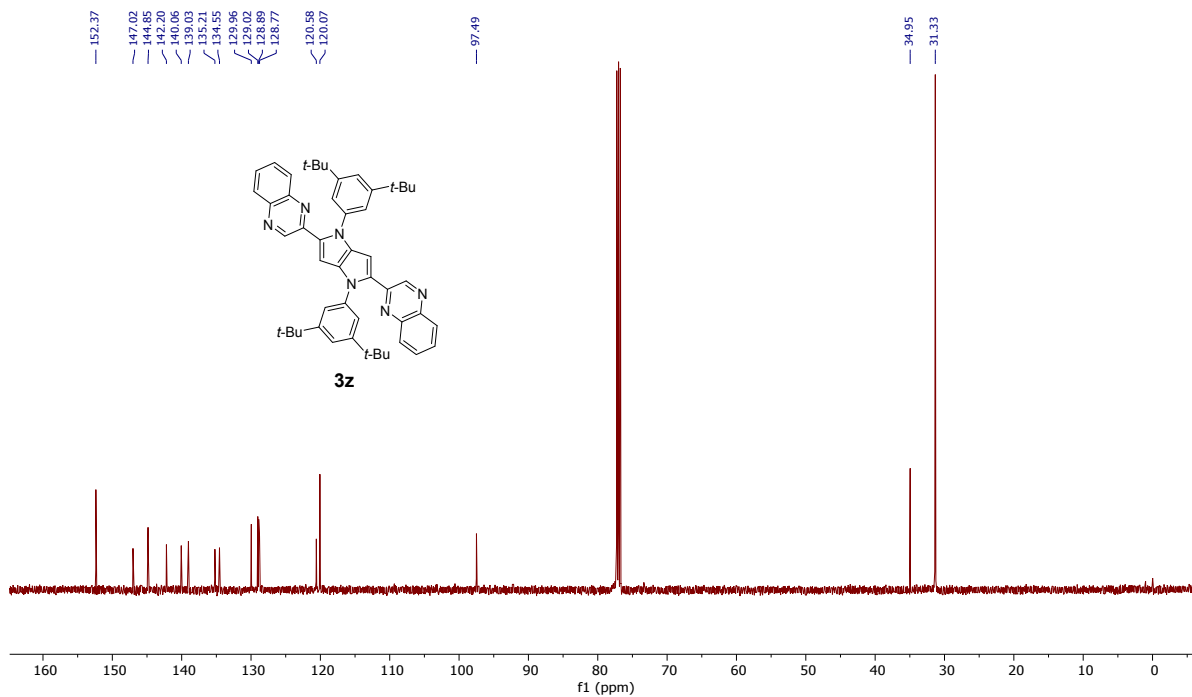

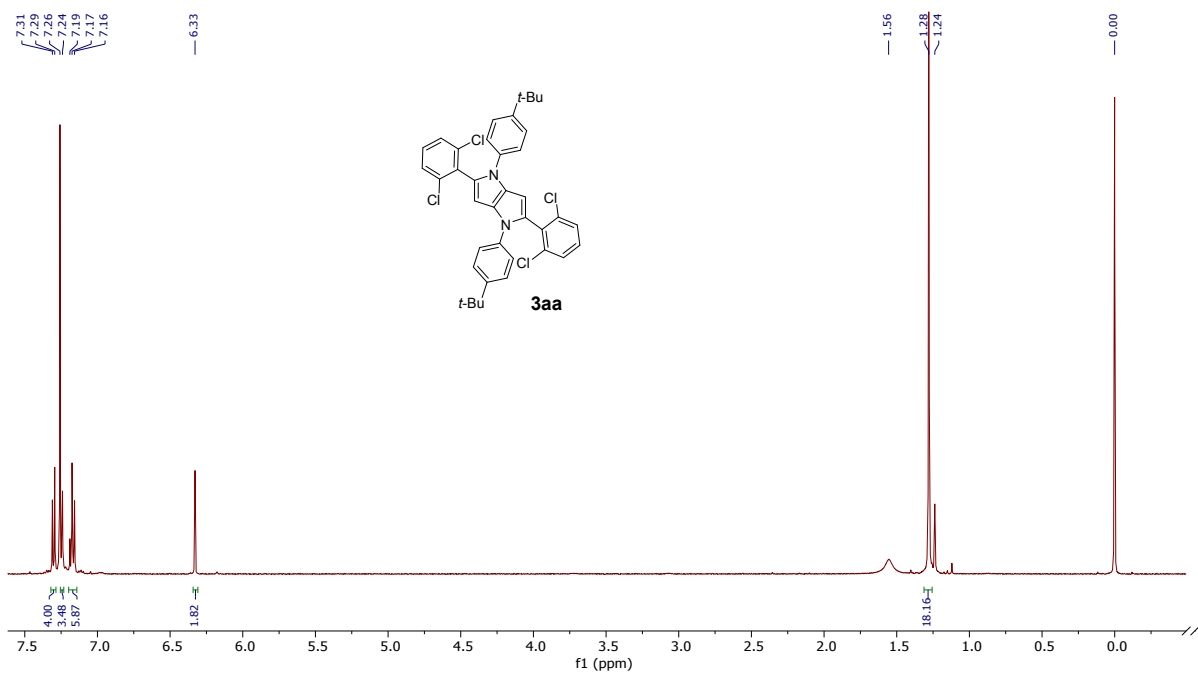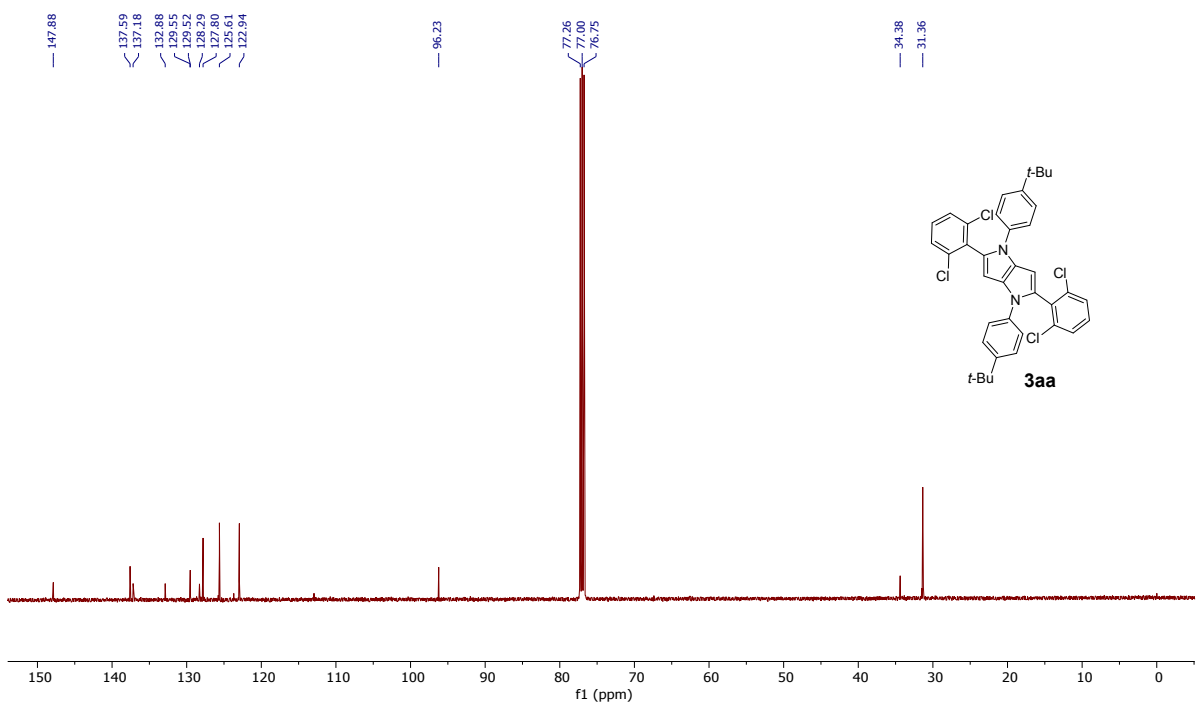

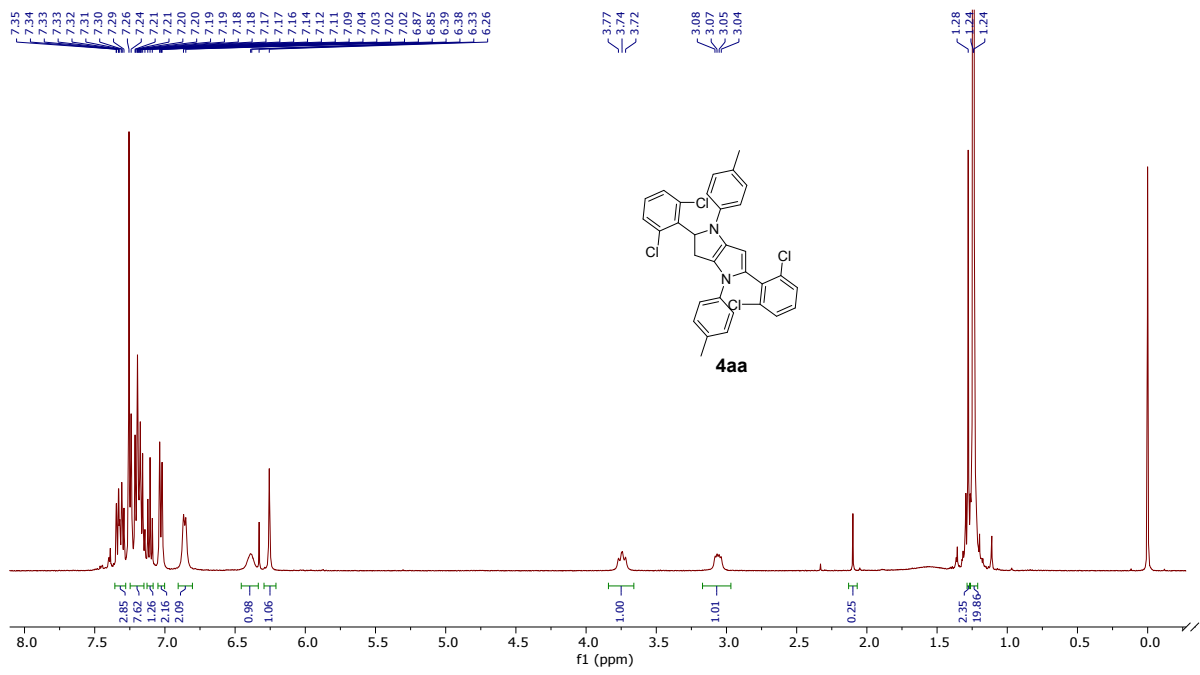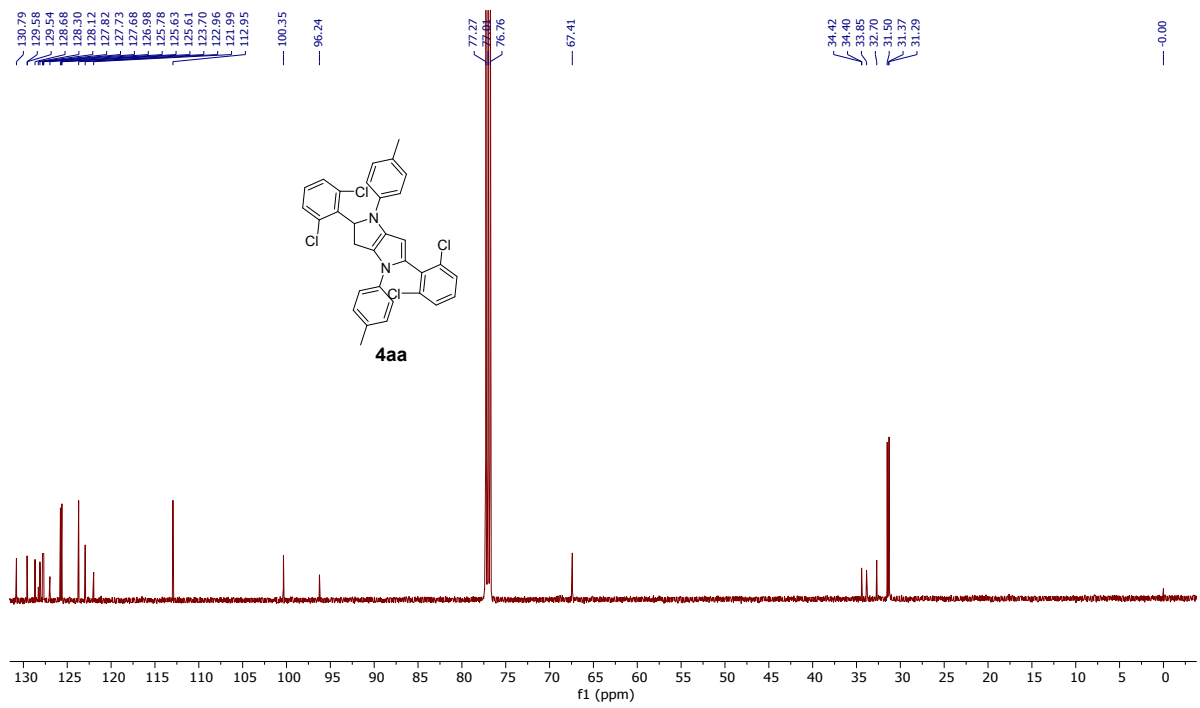

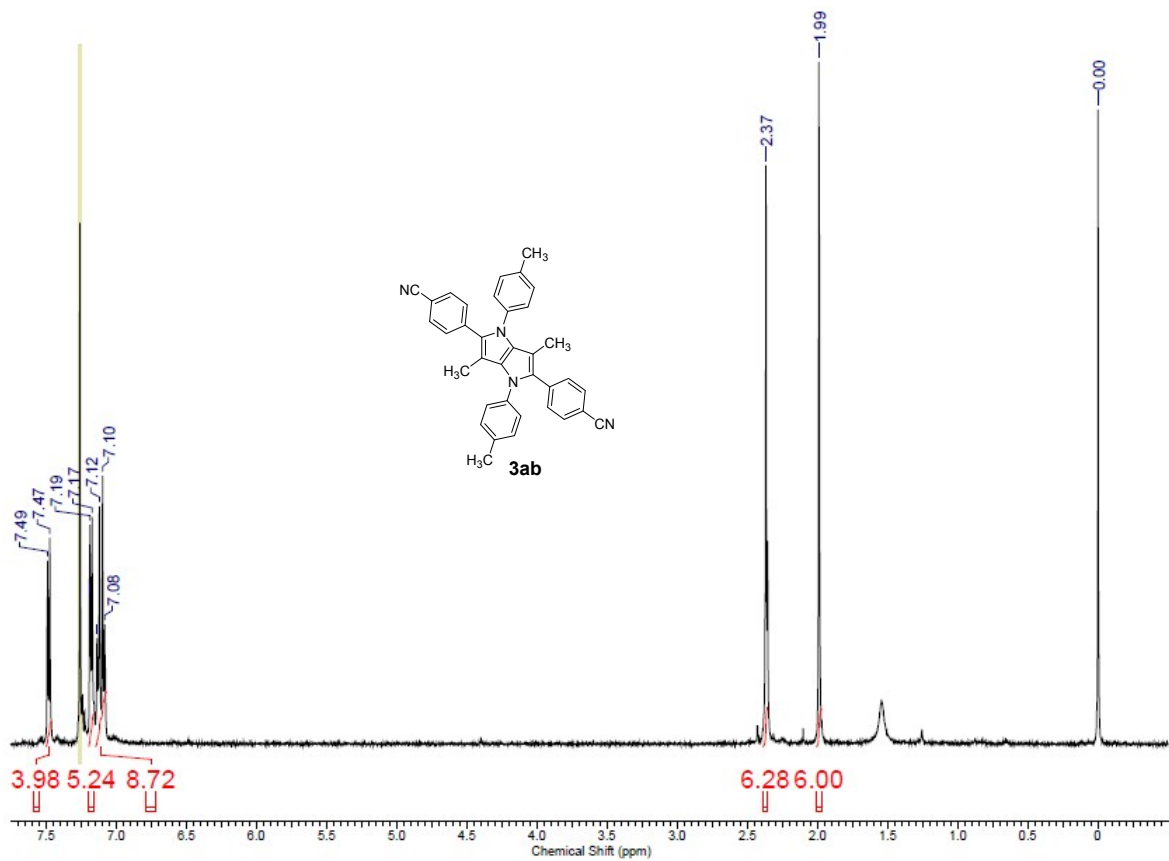

DCY\_02-04-01-C13

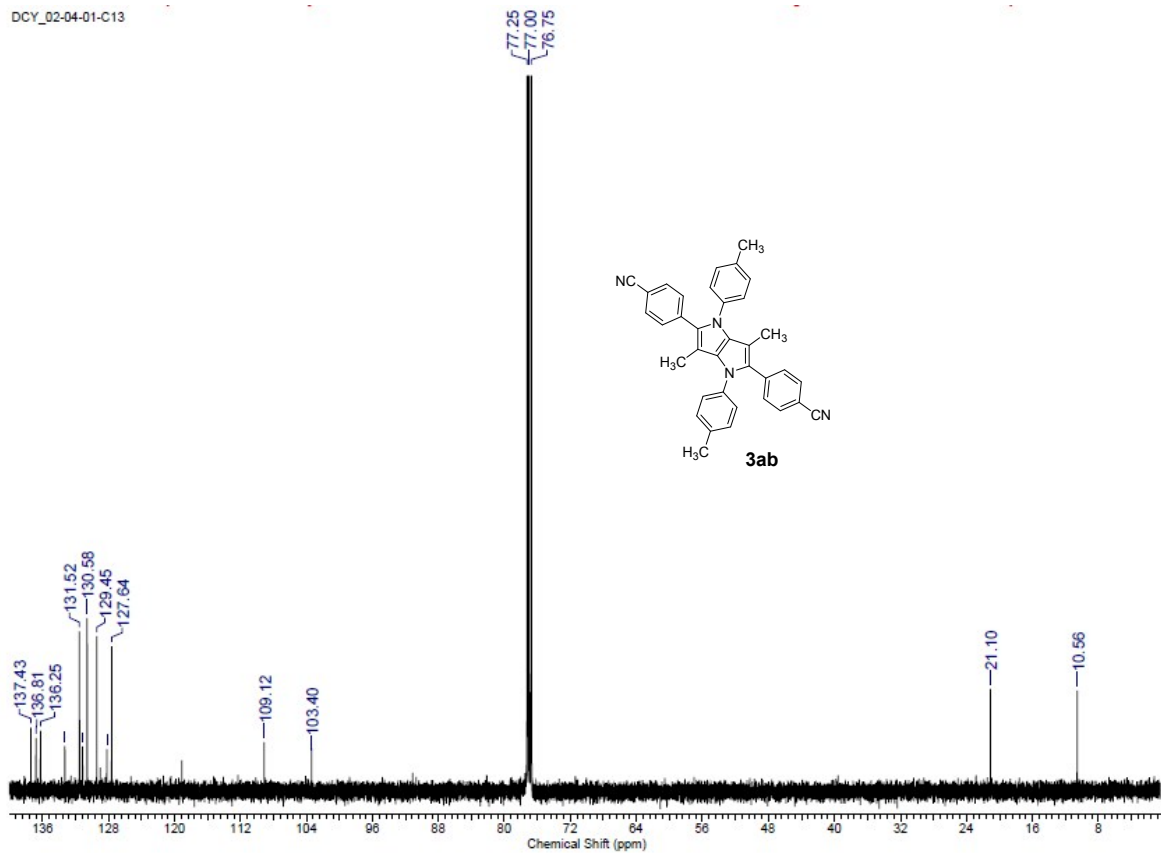

Spectra of compounds **3d**, **3e**, **3f**, **3h**, **3i**, **3k**, **3l**, **3m**, **3o**, **3p**, **3q**, **3r**, **3s**, **3v**, **3y**, **3aa** and **3ab**.

**3d**

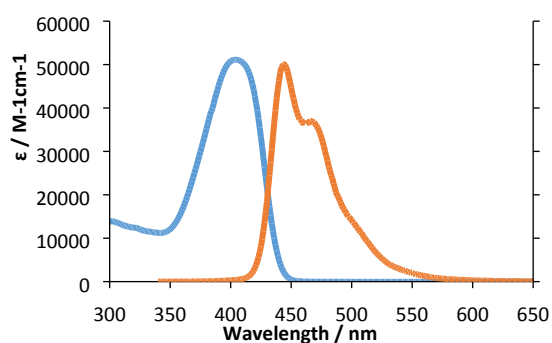

**3e**

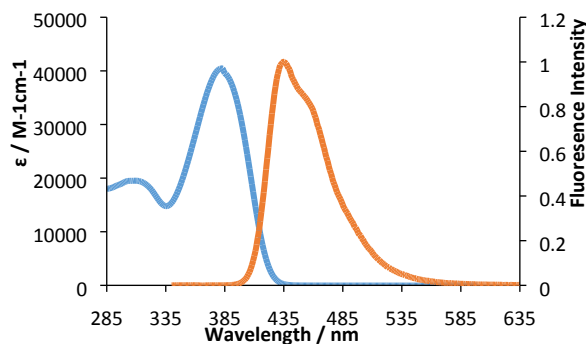

**3f**

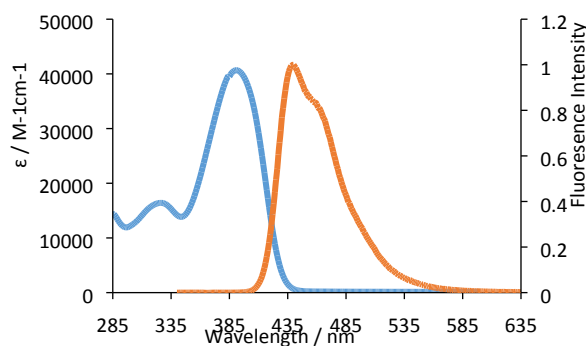

**3h**

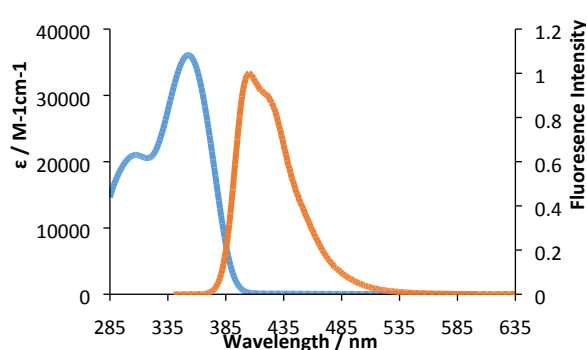

**3i**

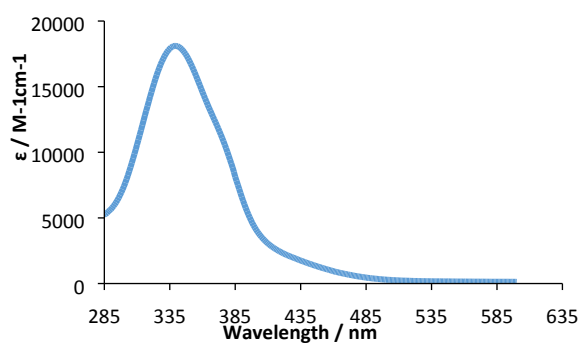

**3k**

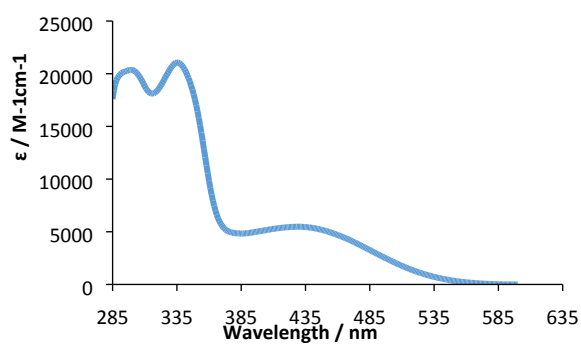

**3l**

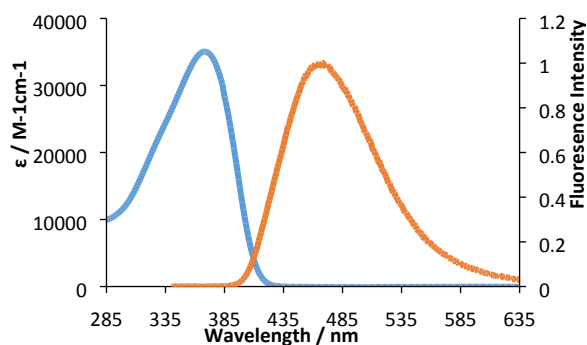

**3m**

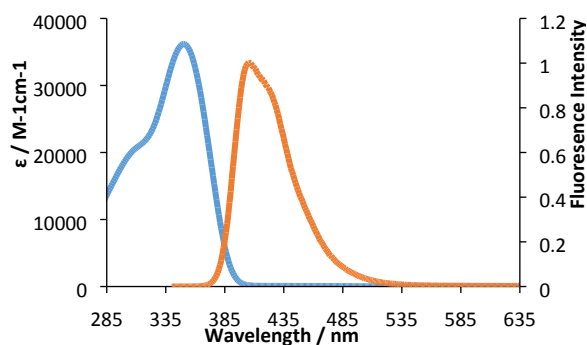

**3o**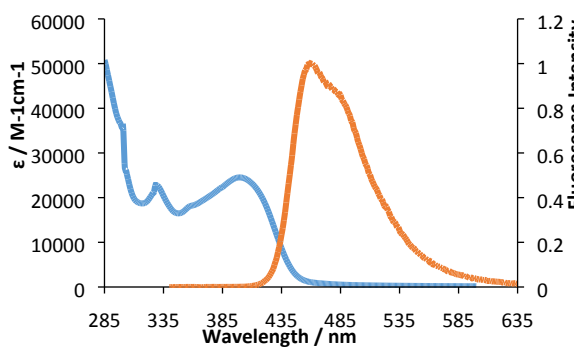**3p**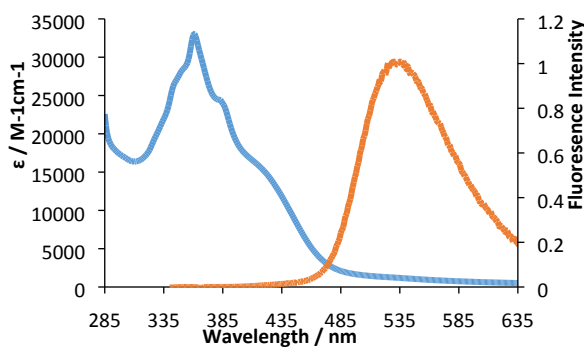**3q**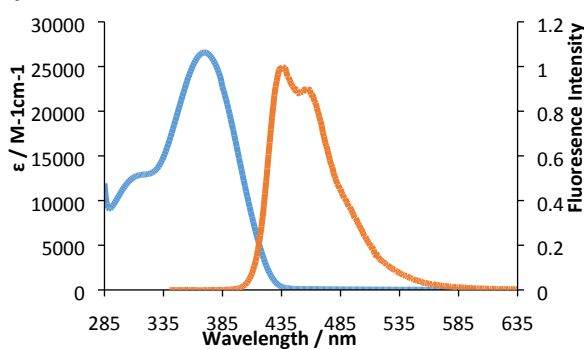**3r**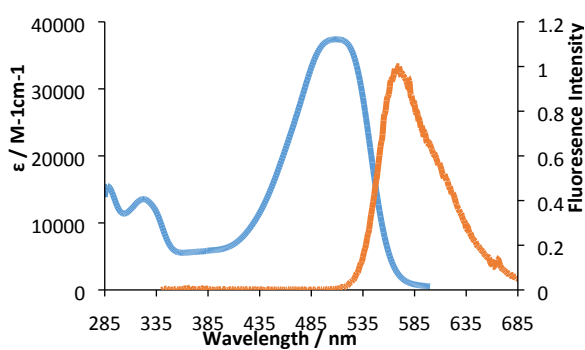**3s**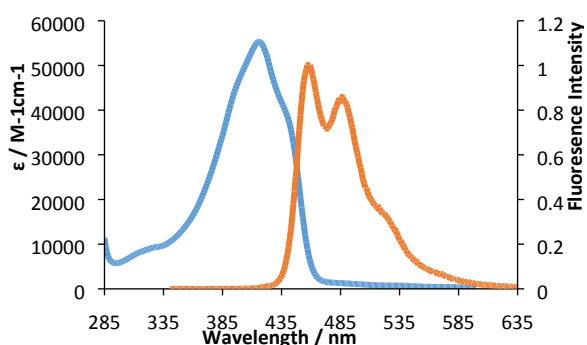**3v**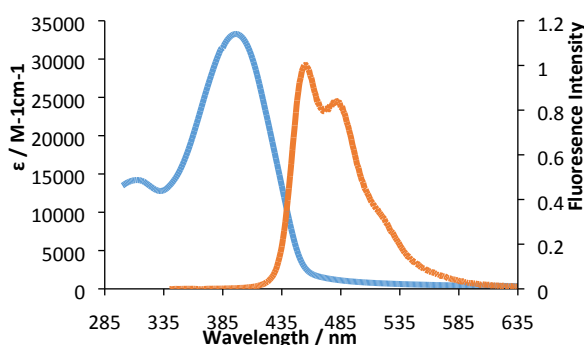**3y**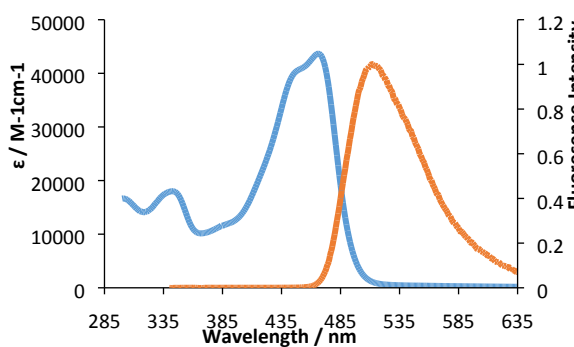**3aa**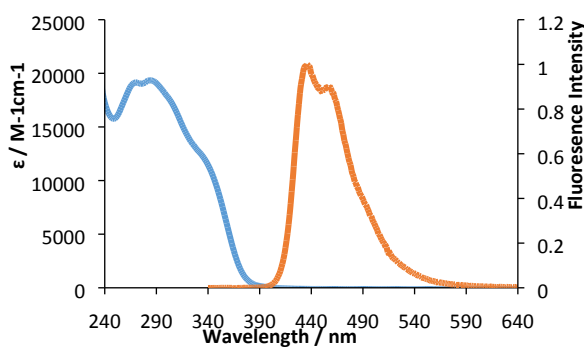



3ab

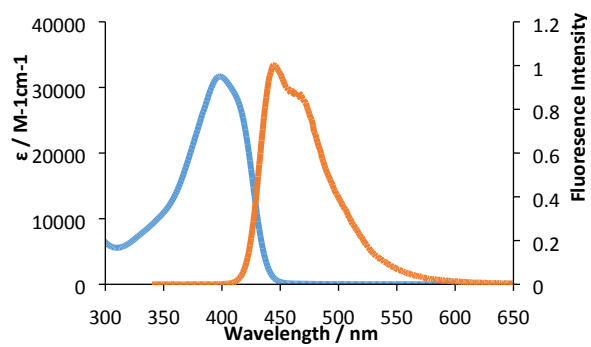

Supplement: c9qo00675c1.pdf [file c9qo00675c1.pdf]
